# Supplementary material
Source: PubMed Central journal article supplement (PMC5573082)
Supplement: JB.00218-17_zjb999094460s3.pdf [file JB.00218-17_zjb999094460s3.pdf]

**Figure S1.** Domain architectures of HKIII protein sequences revealed by CDvist.

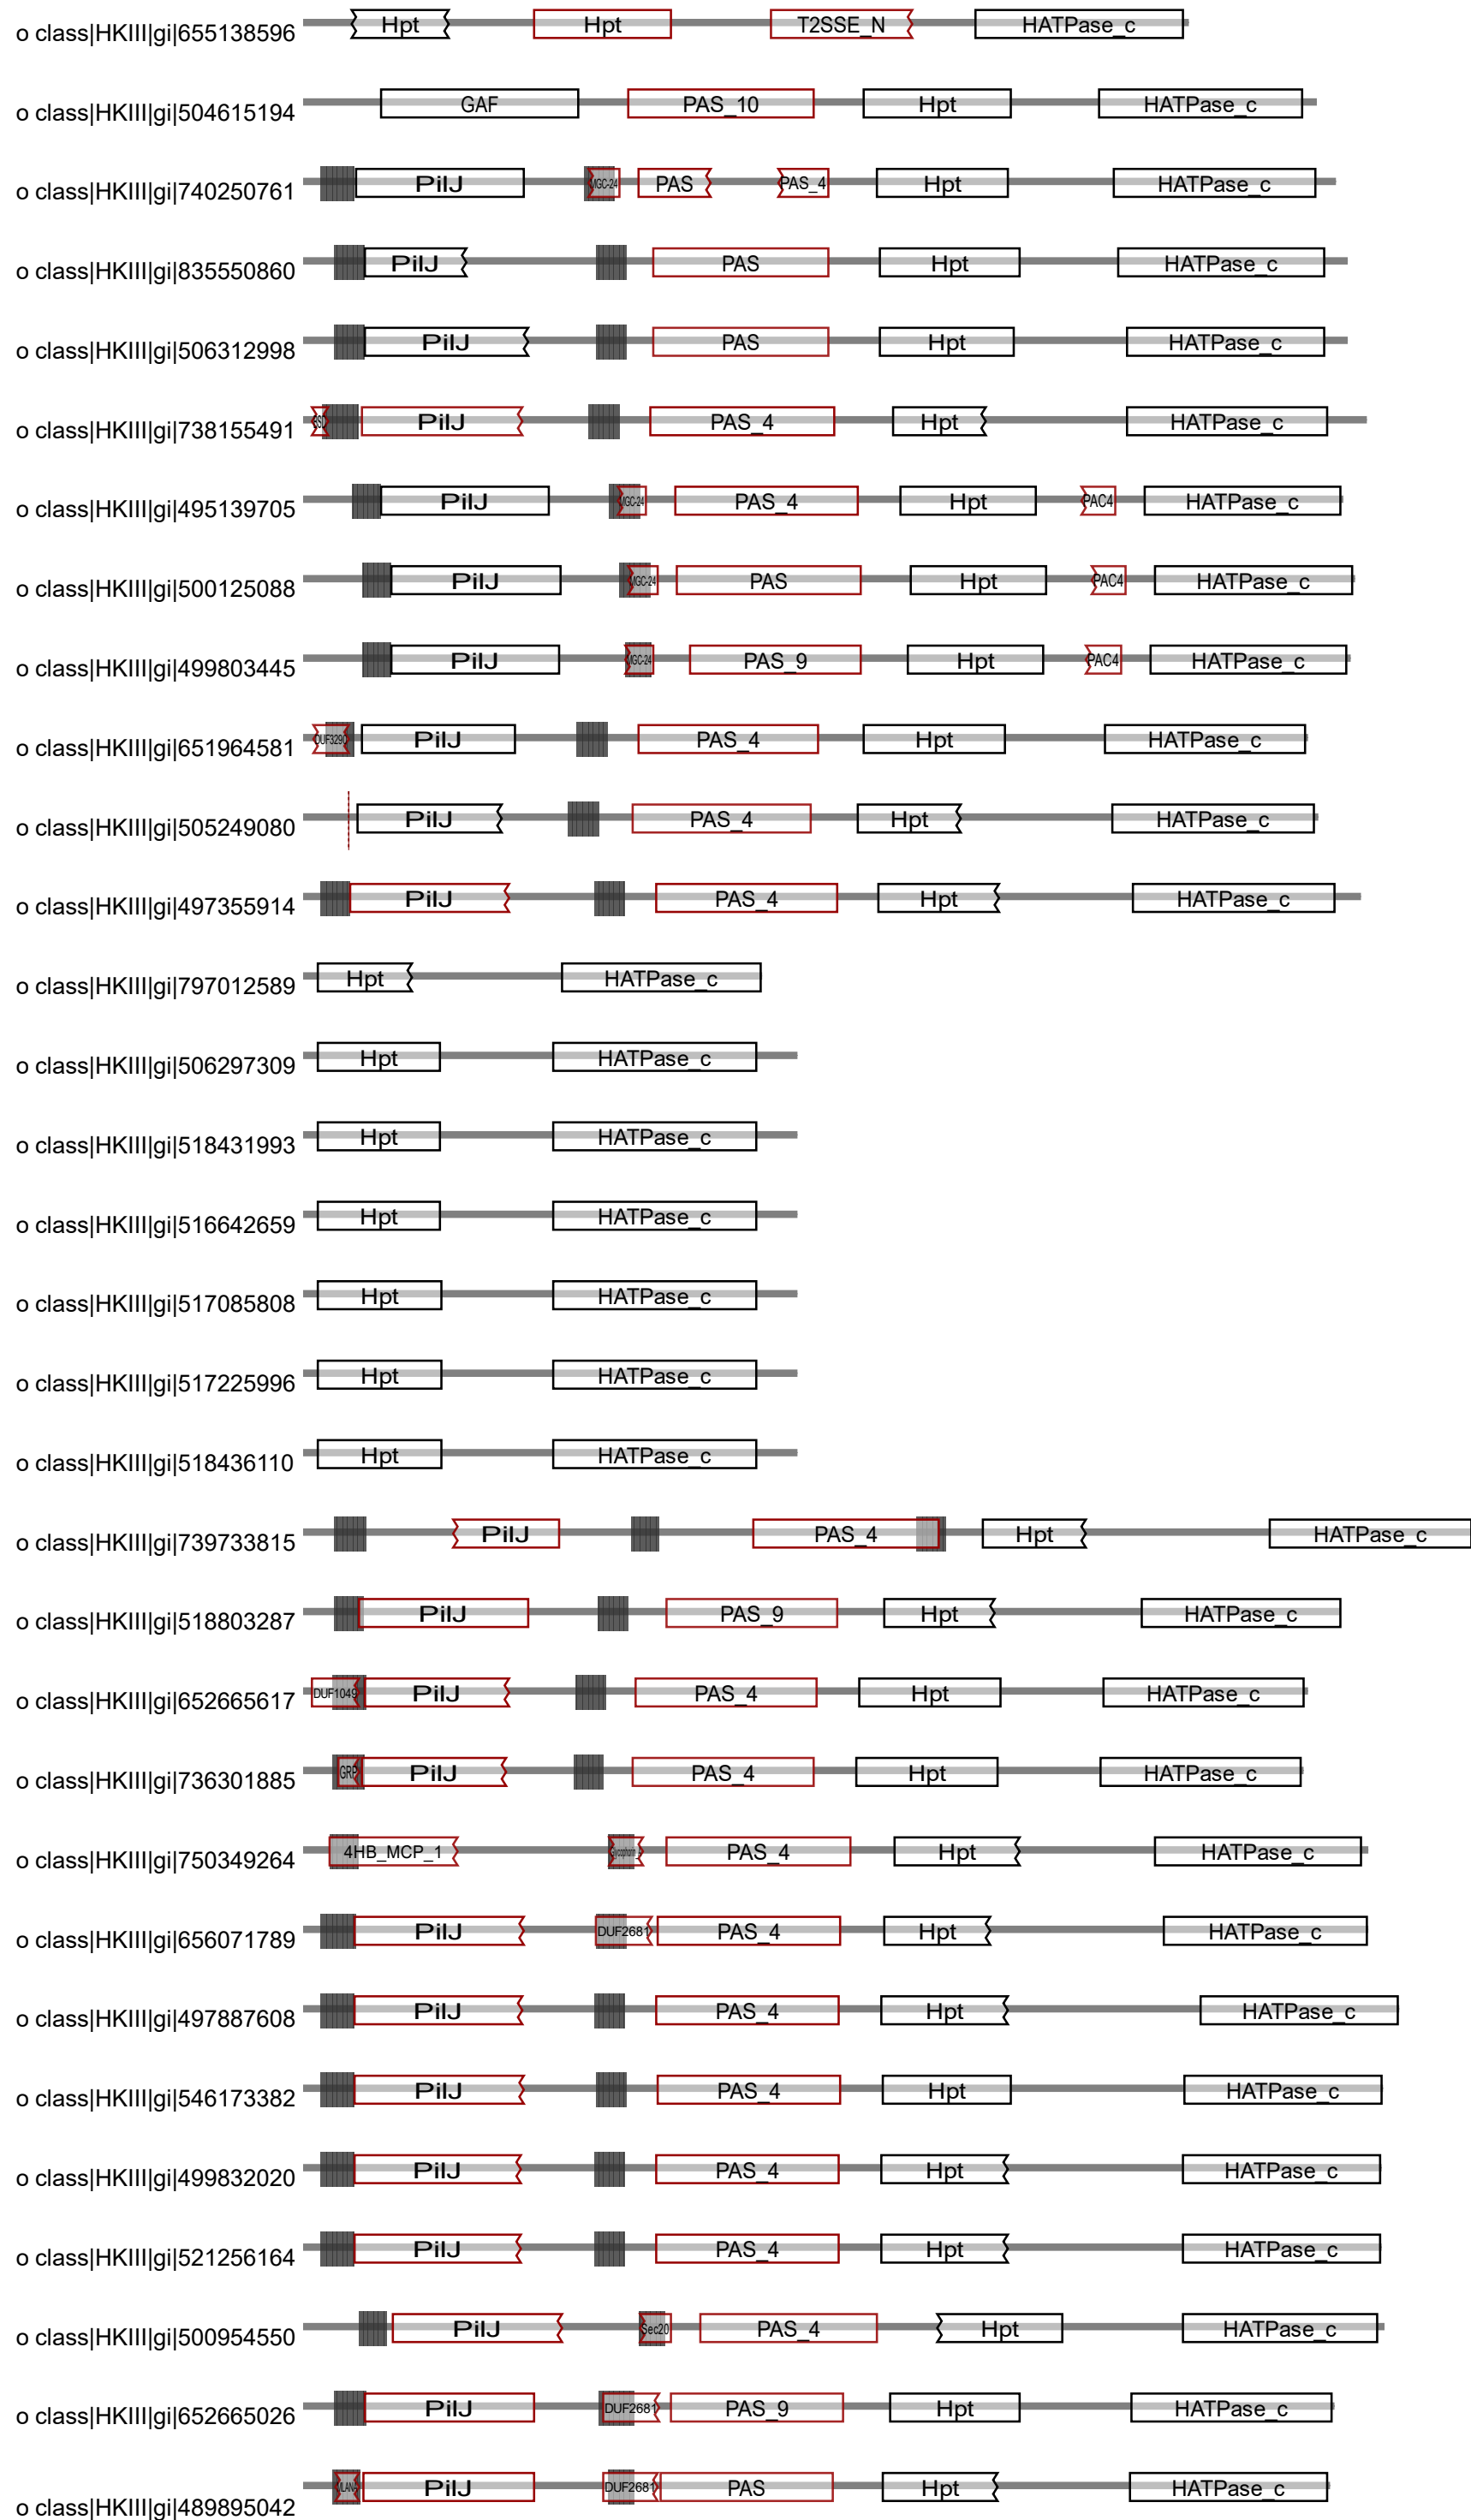

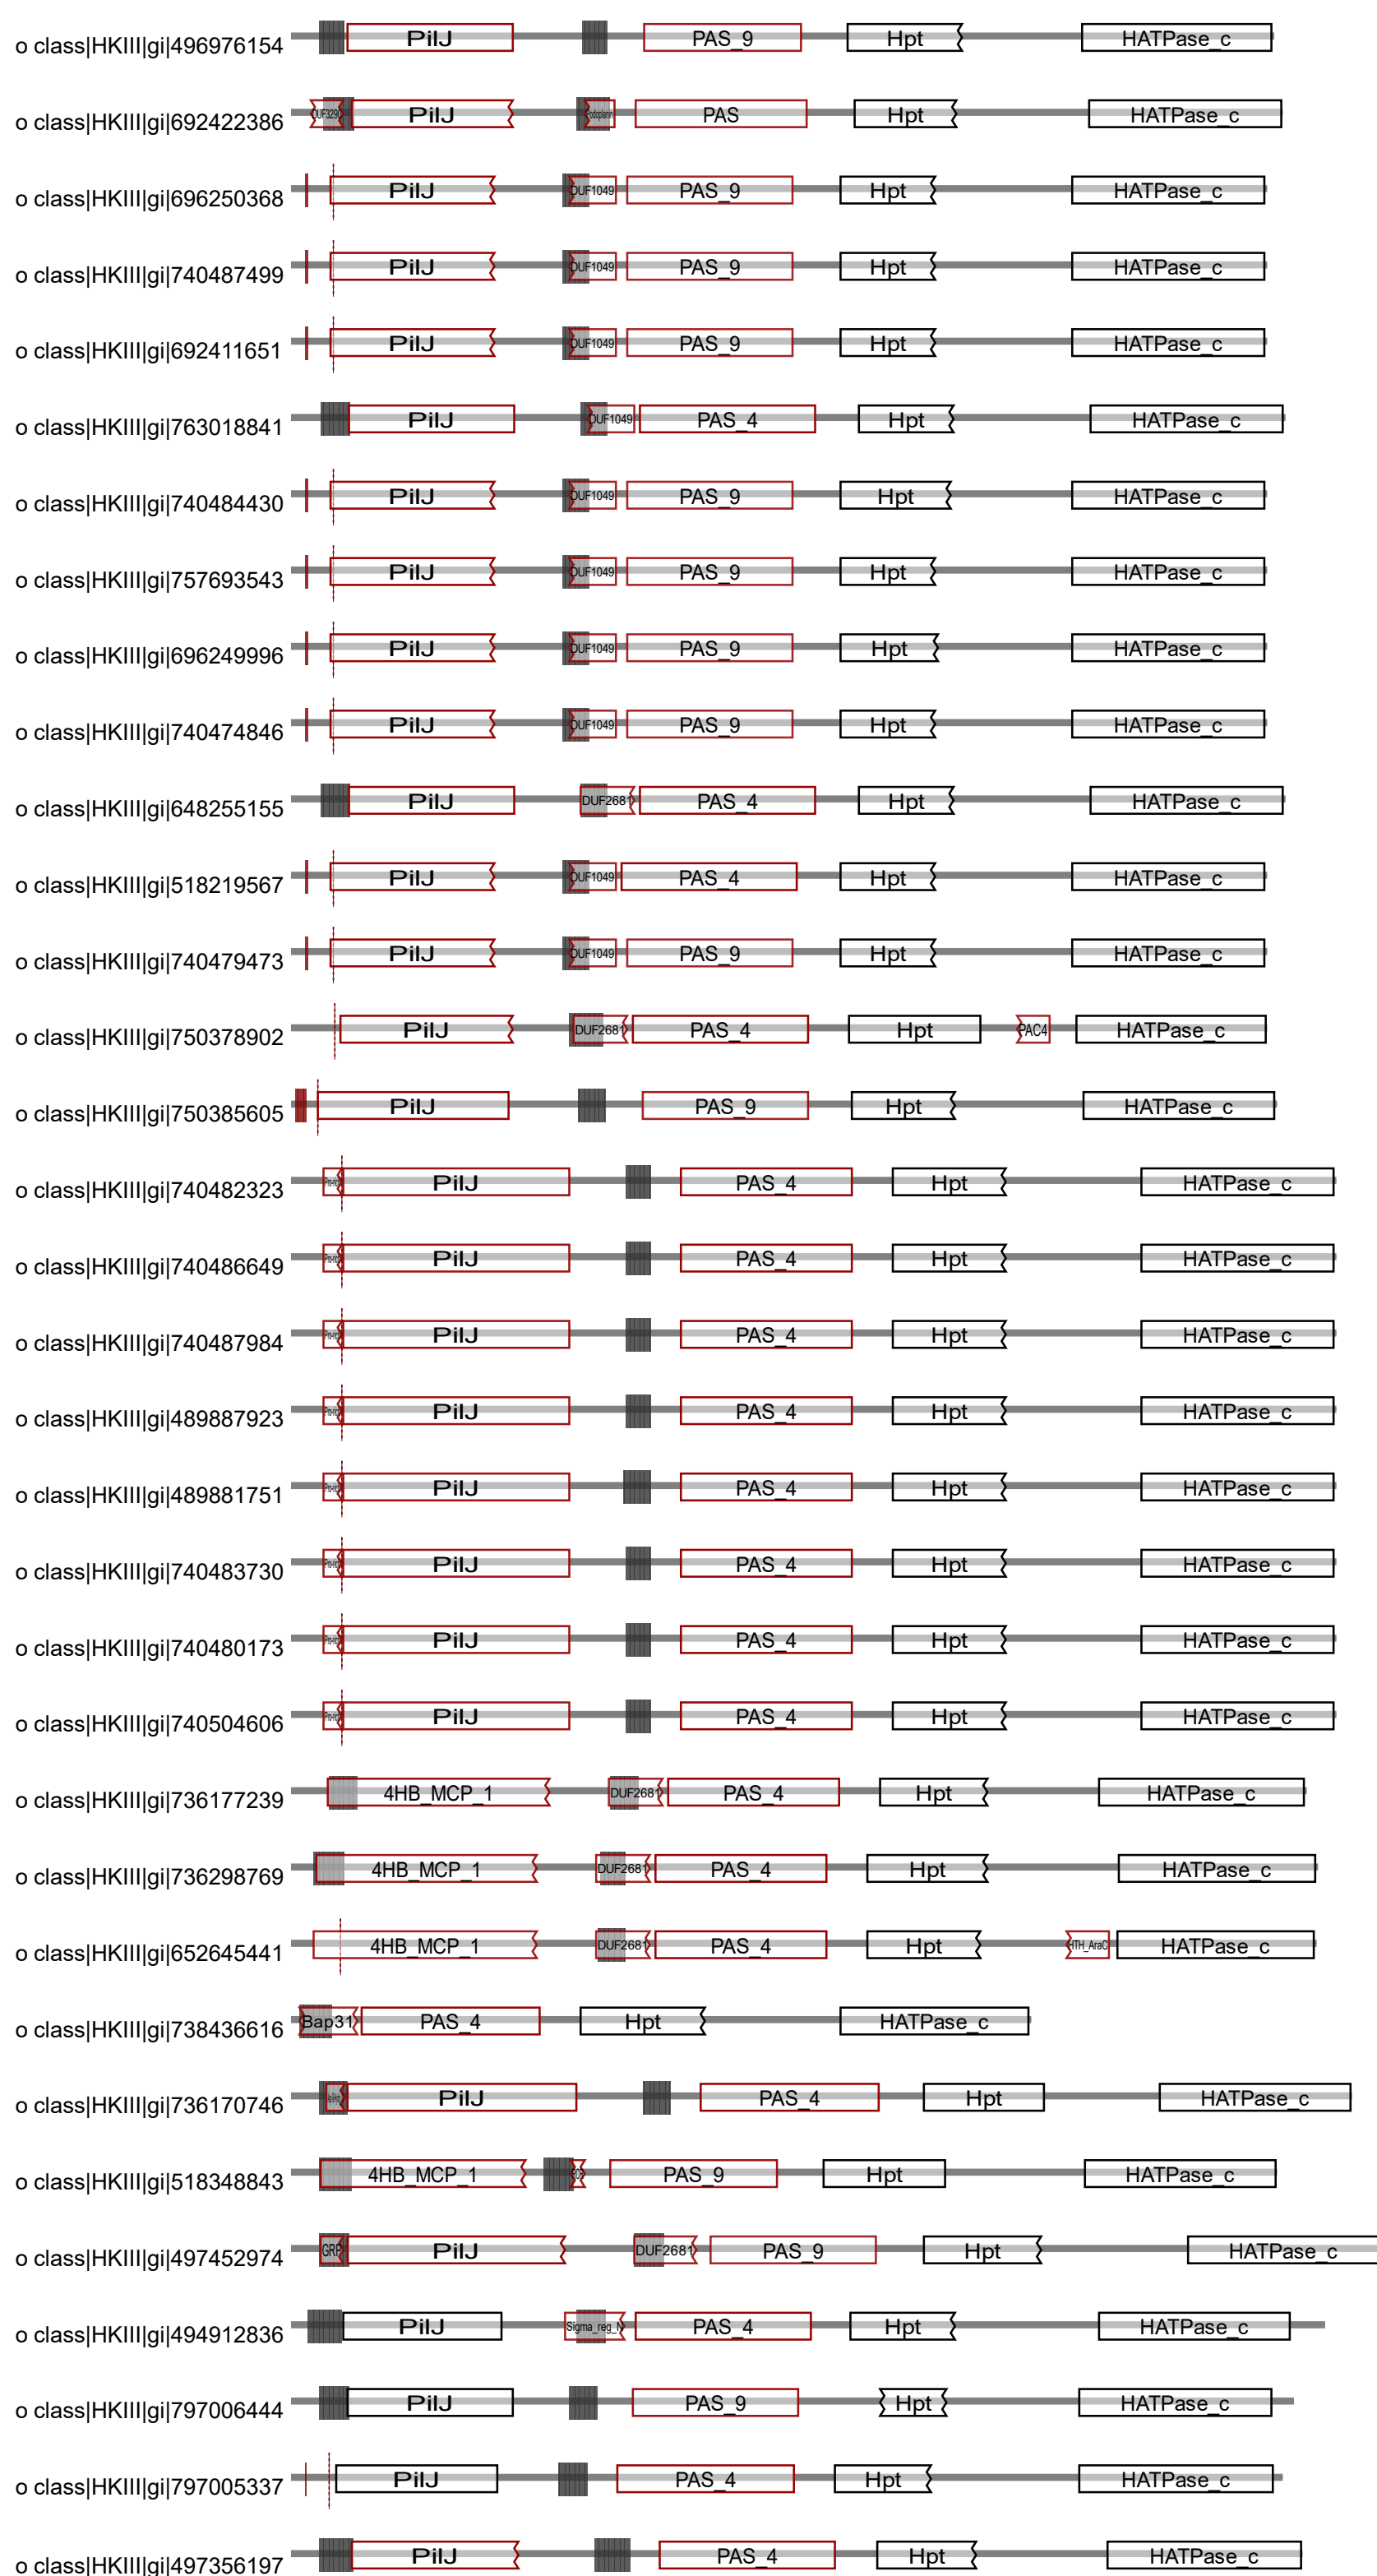

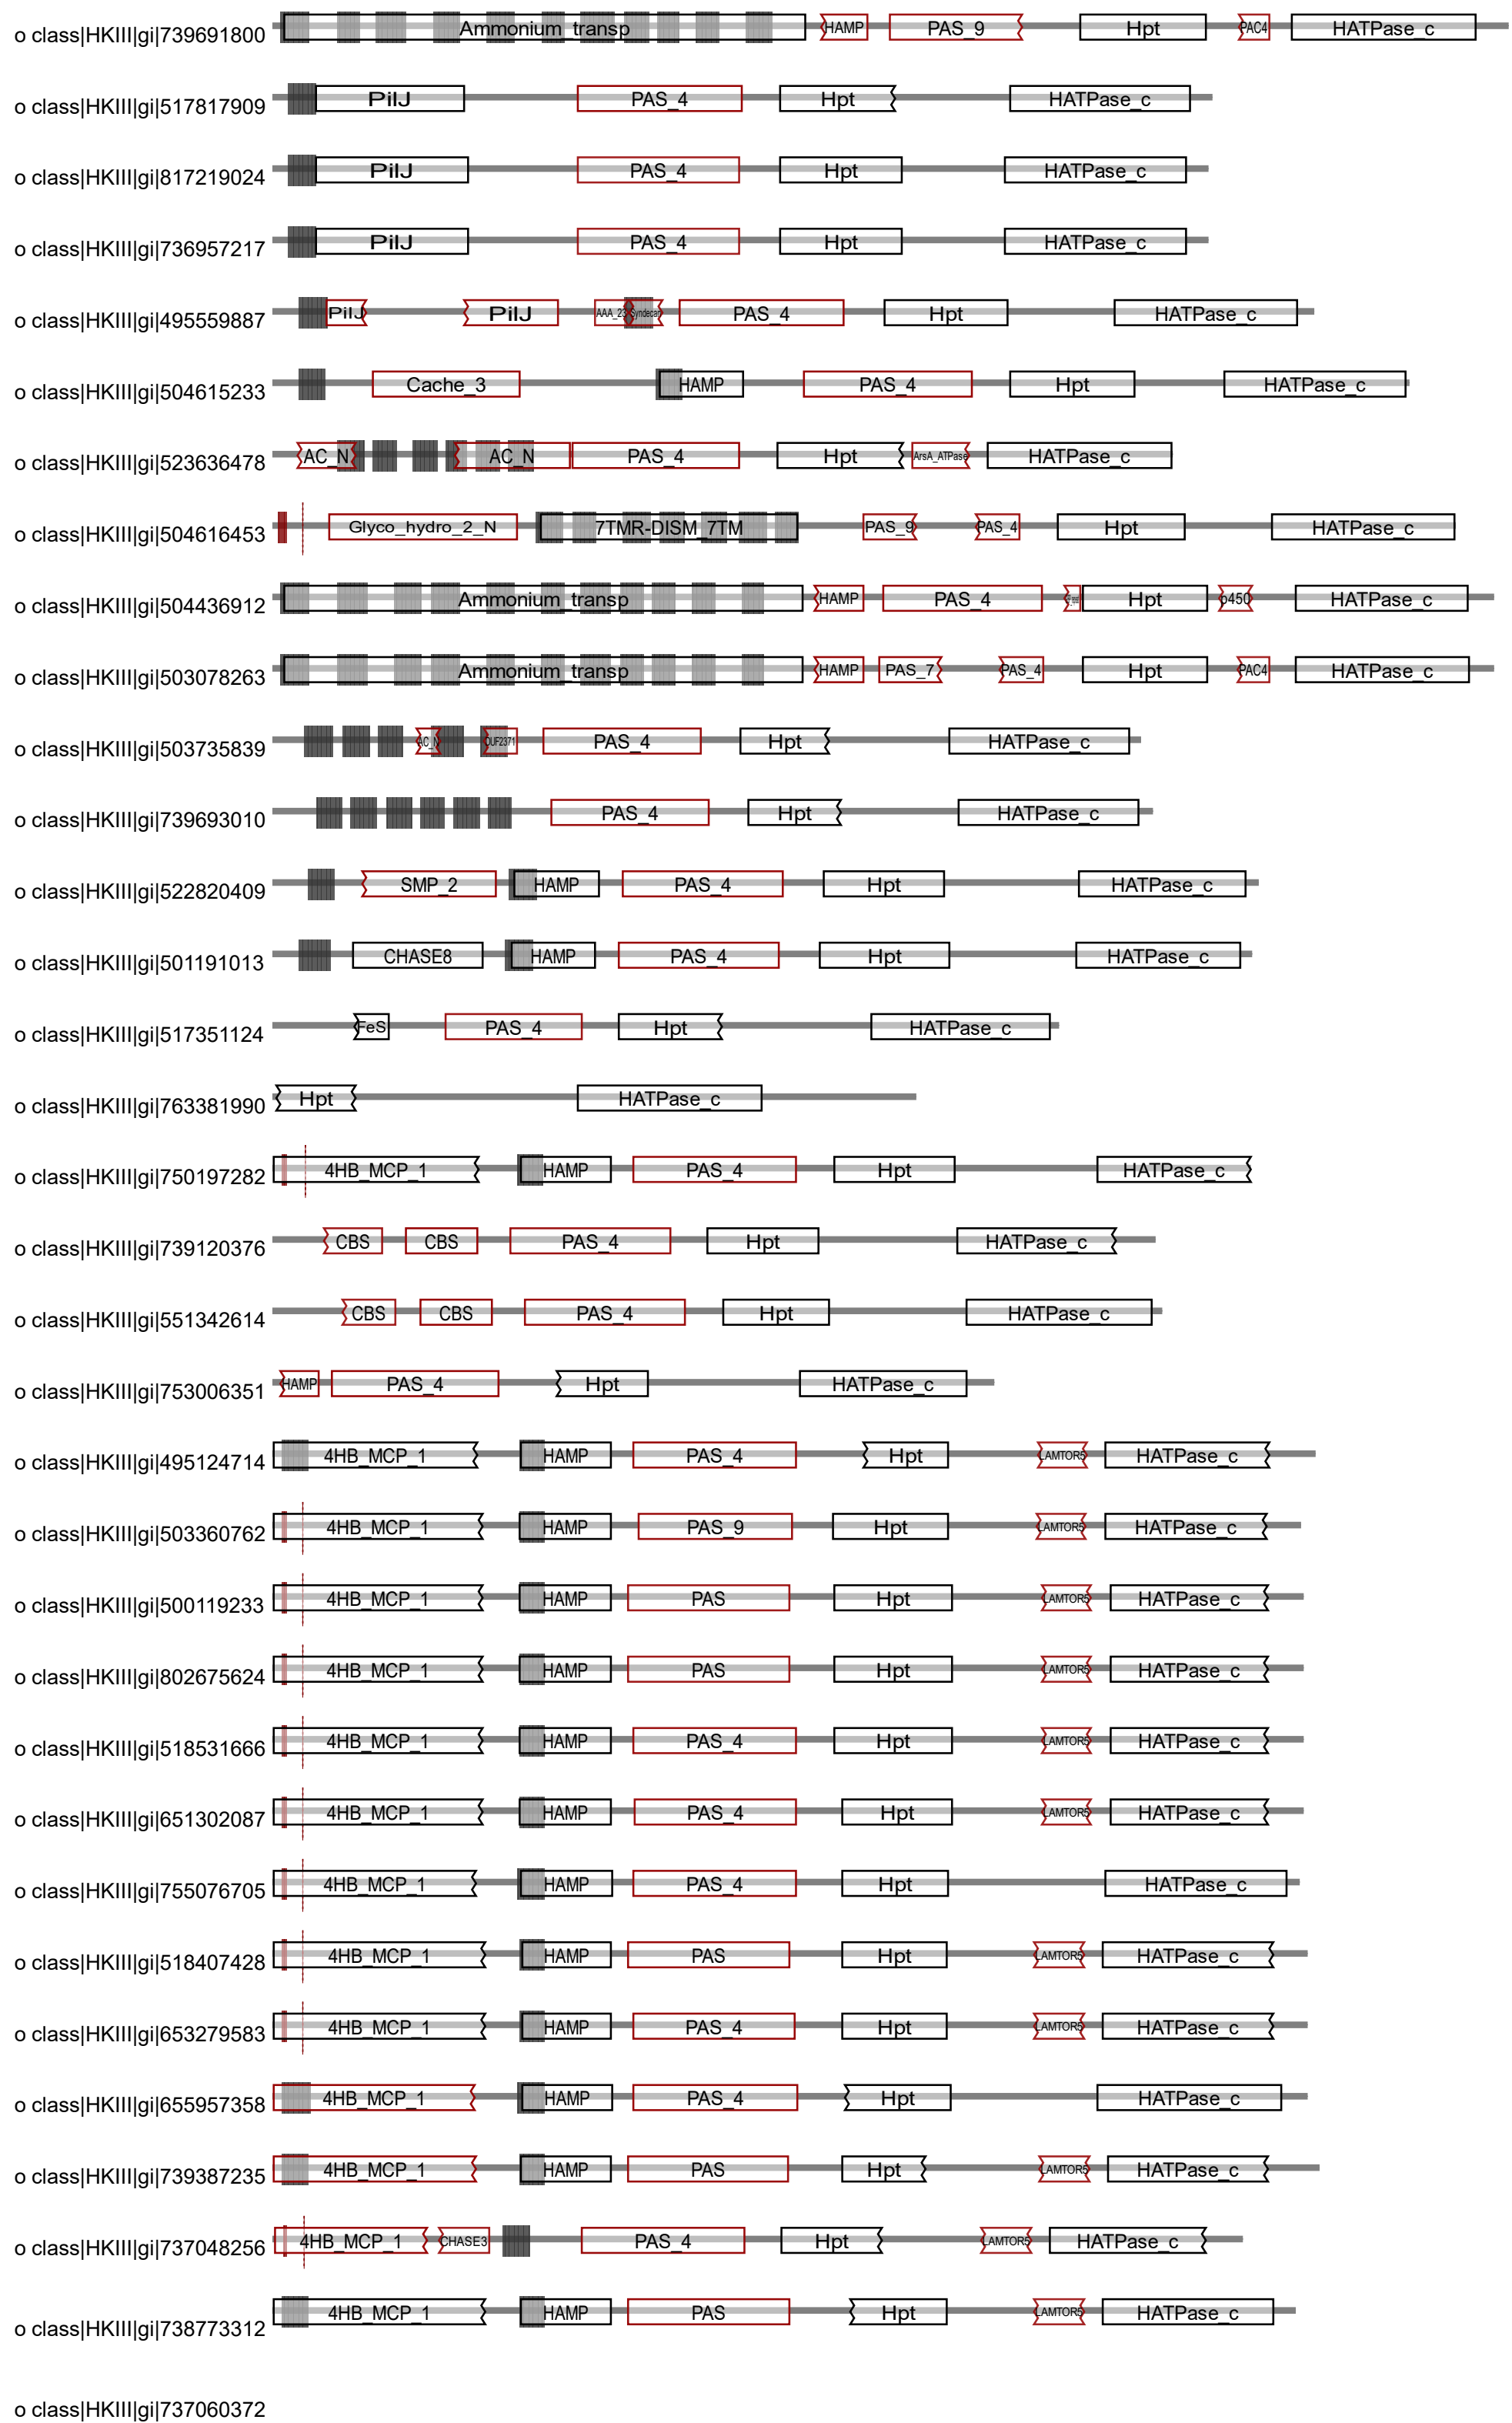

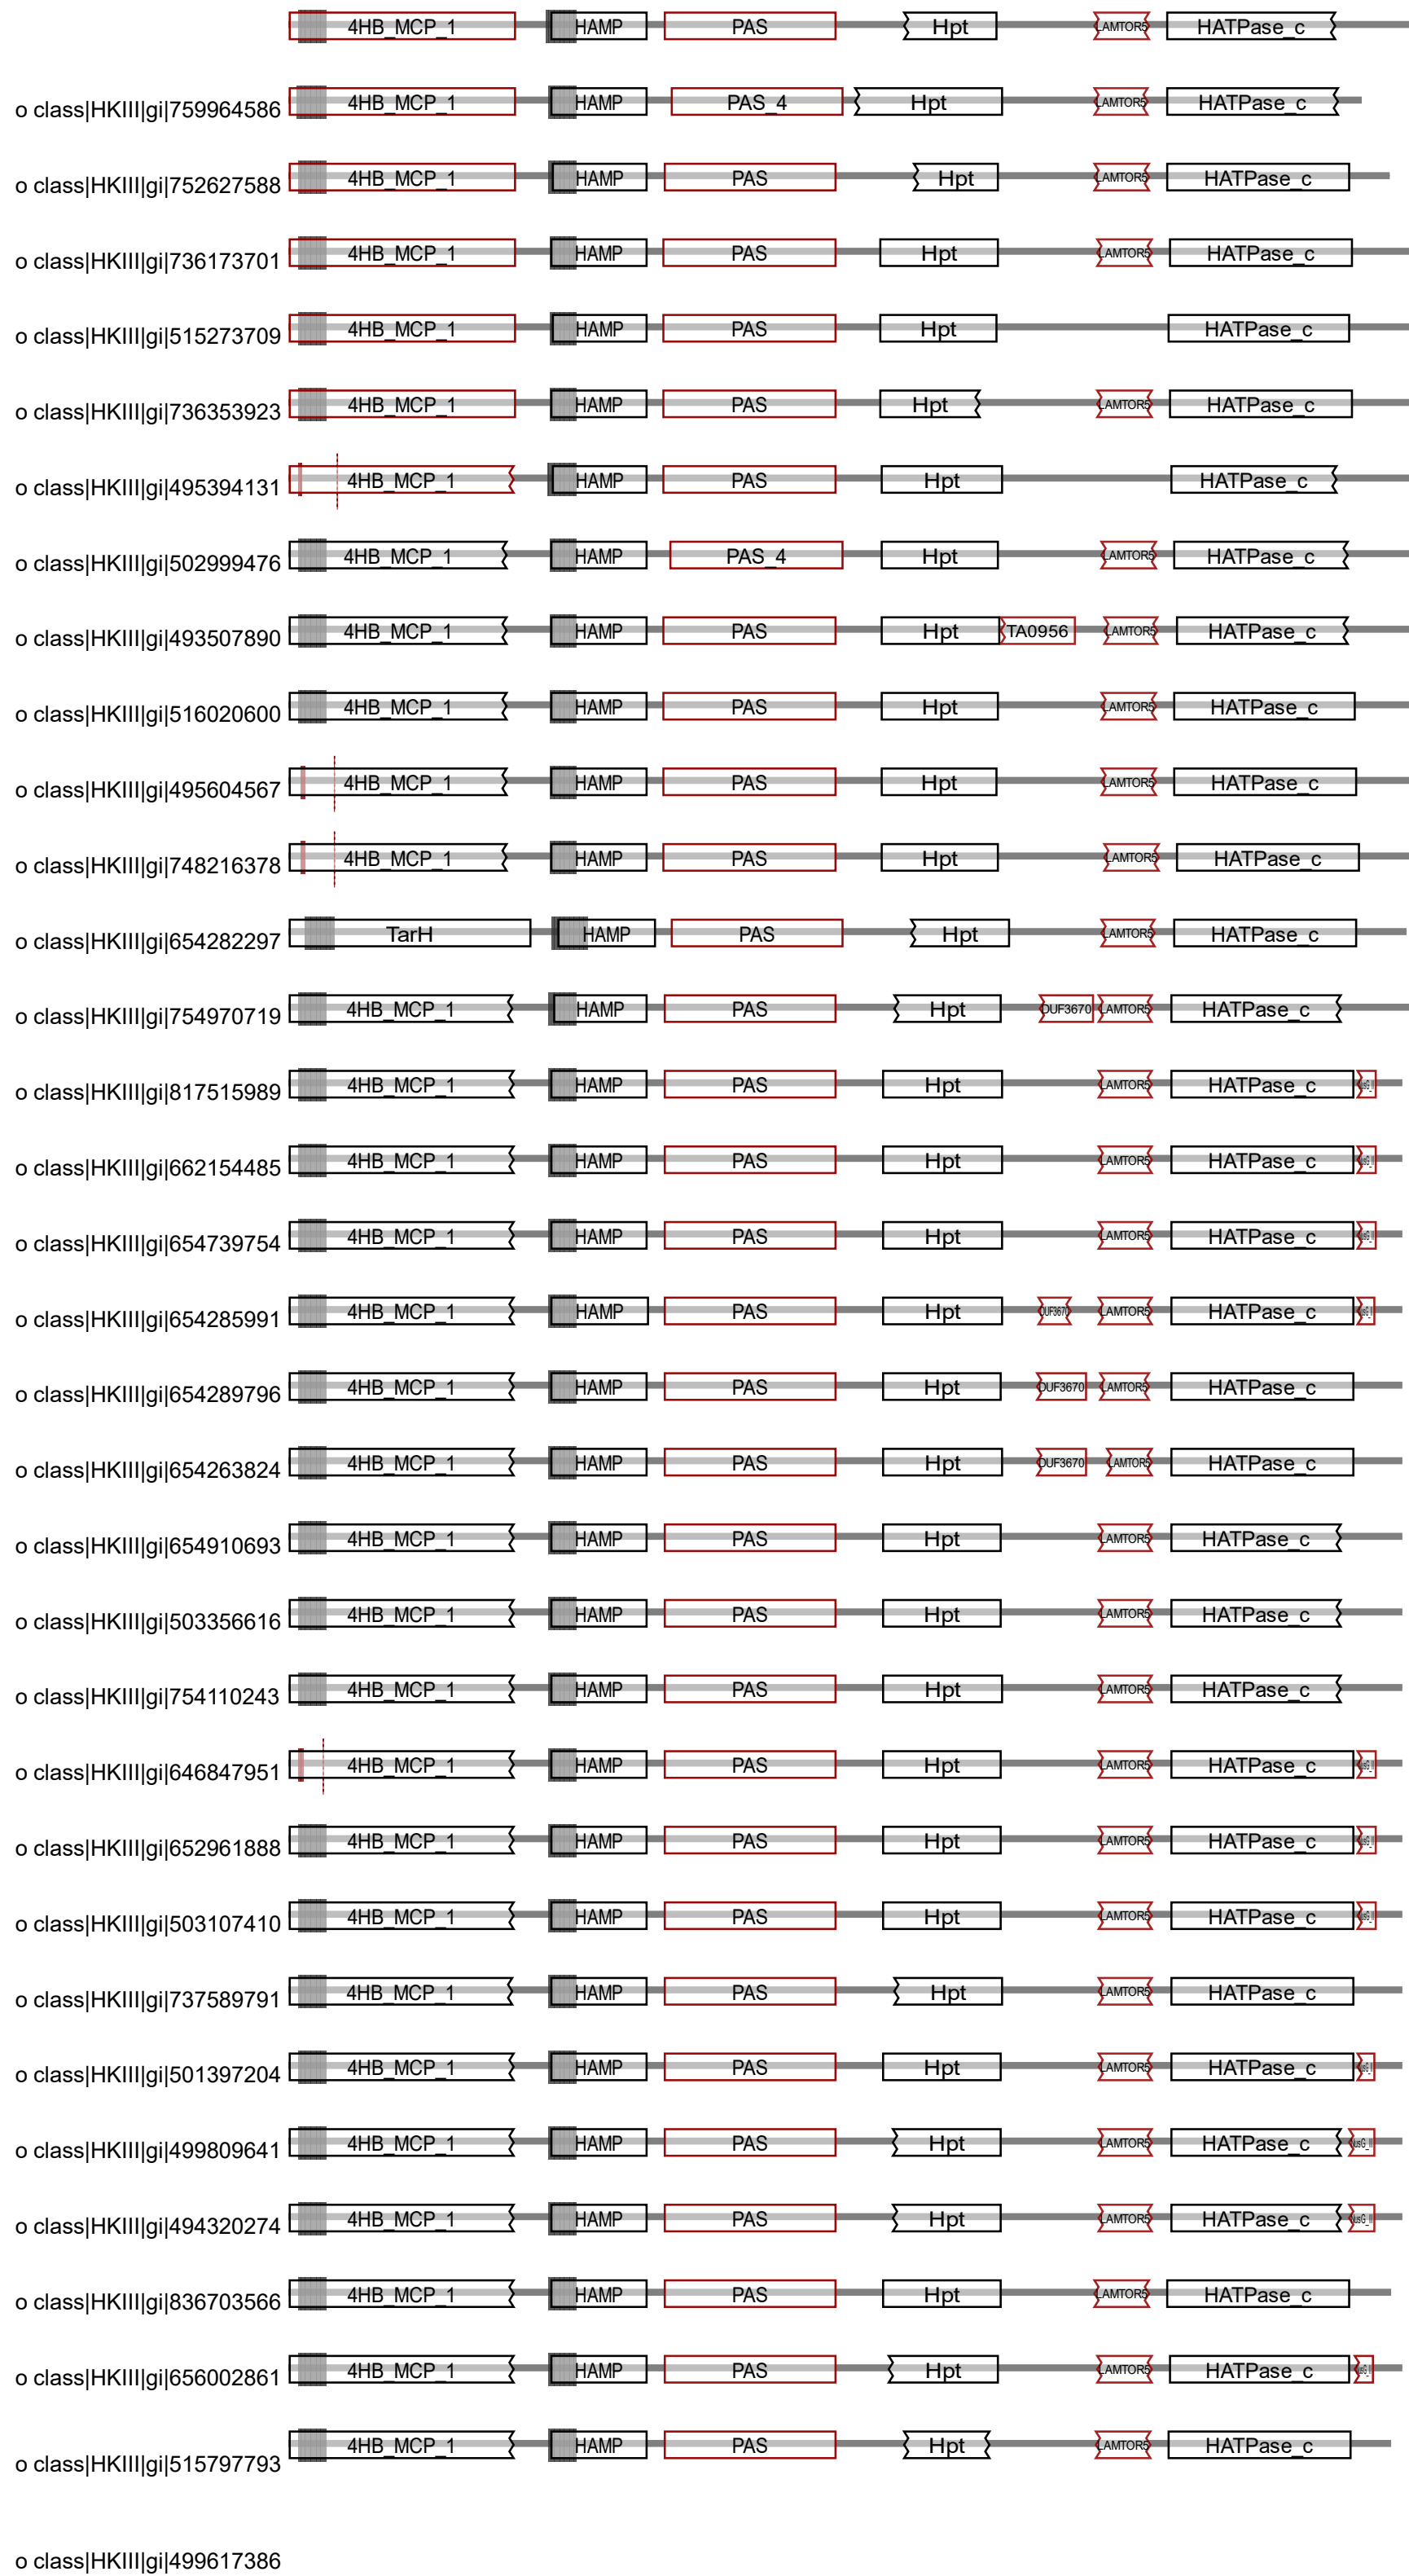

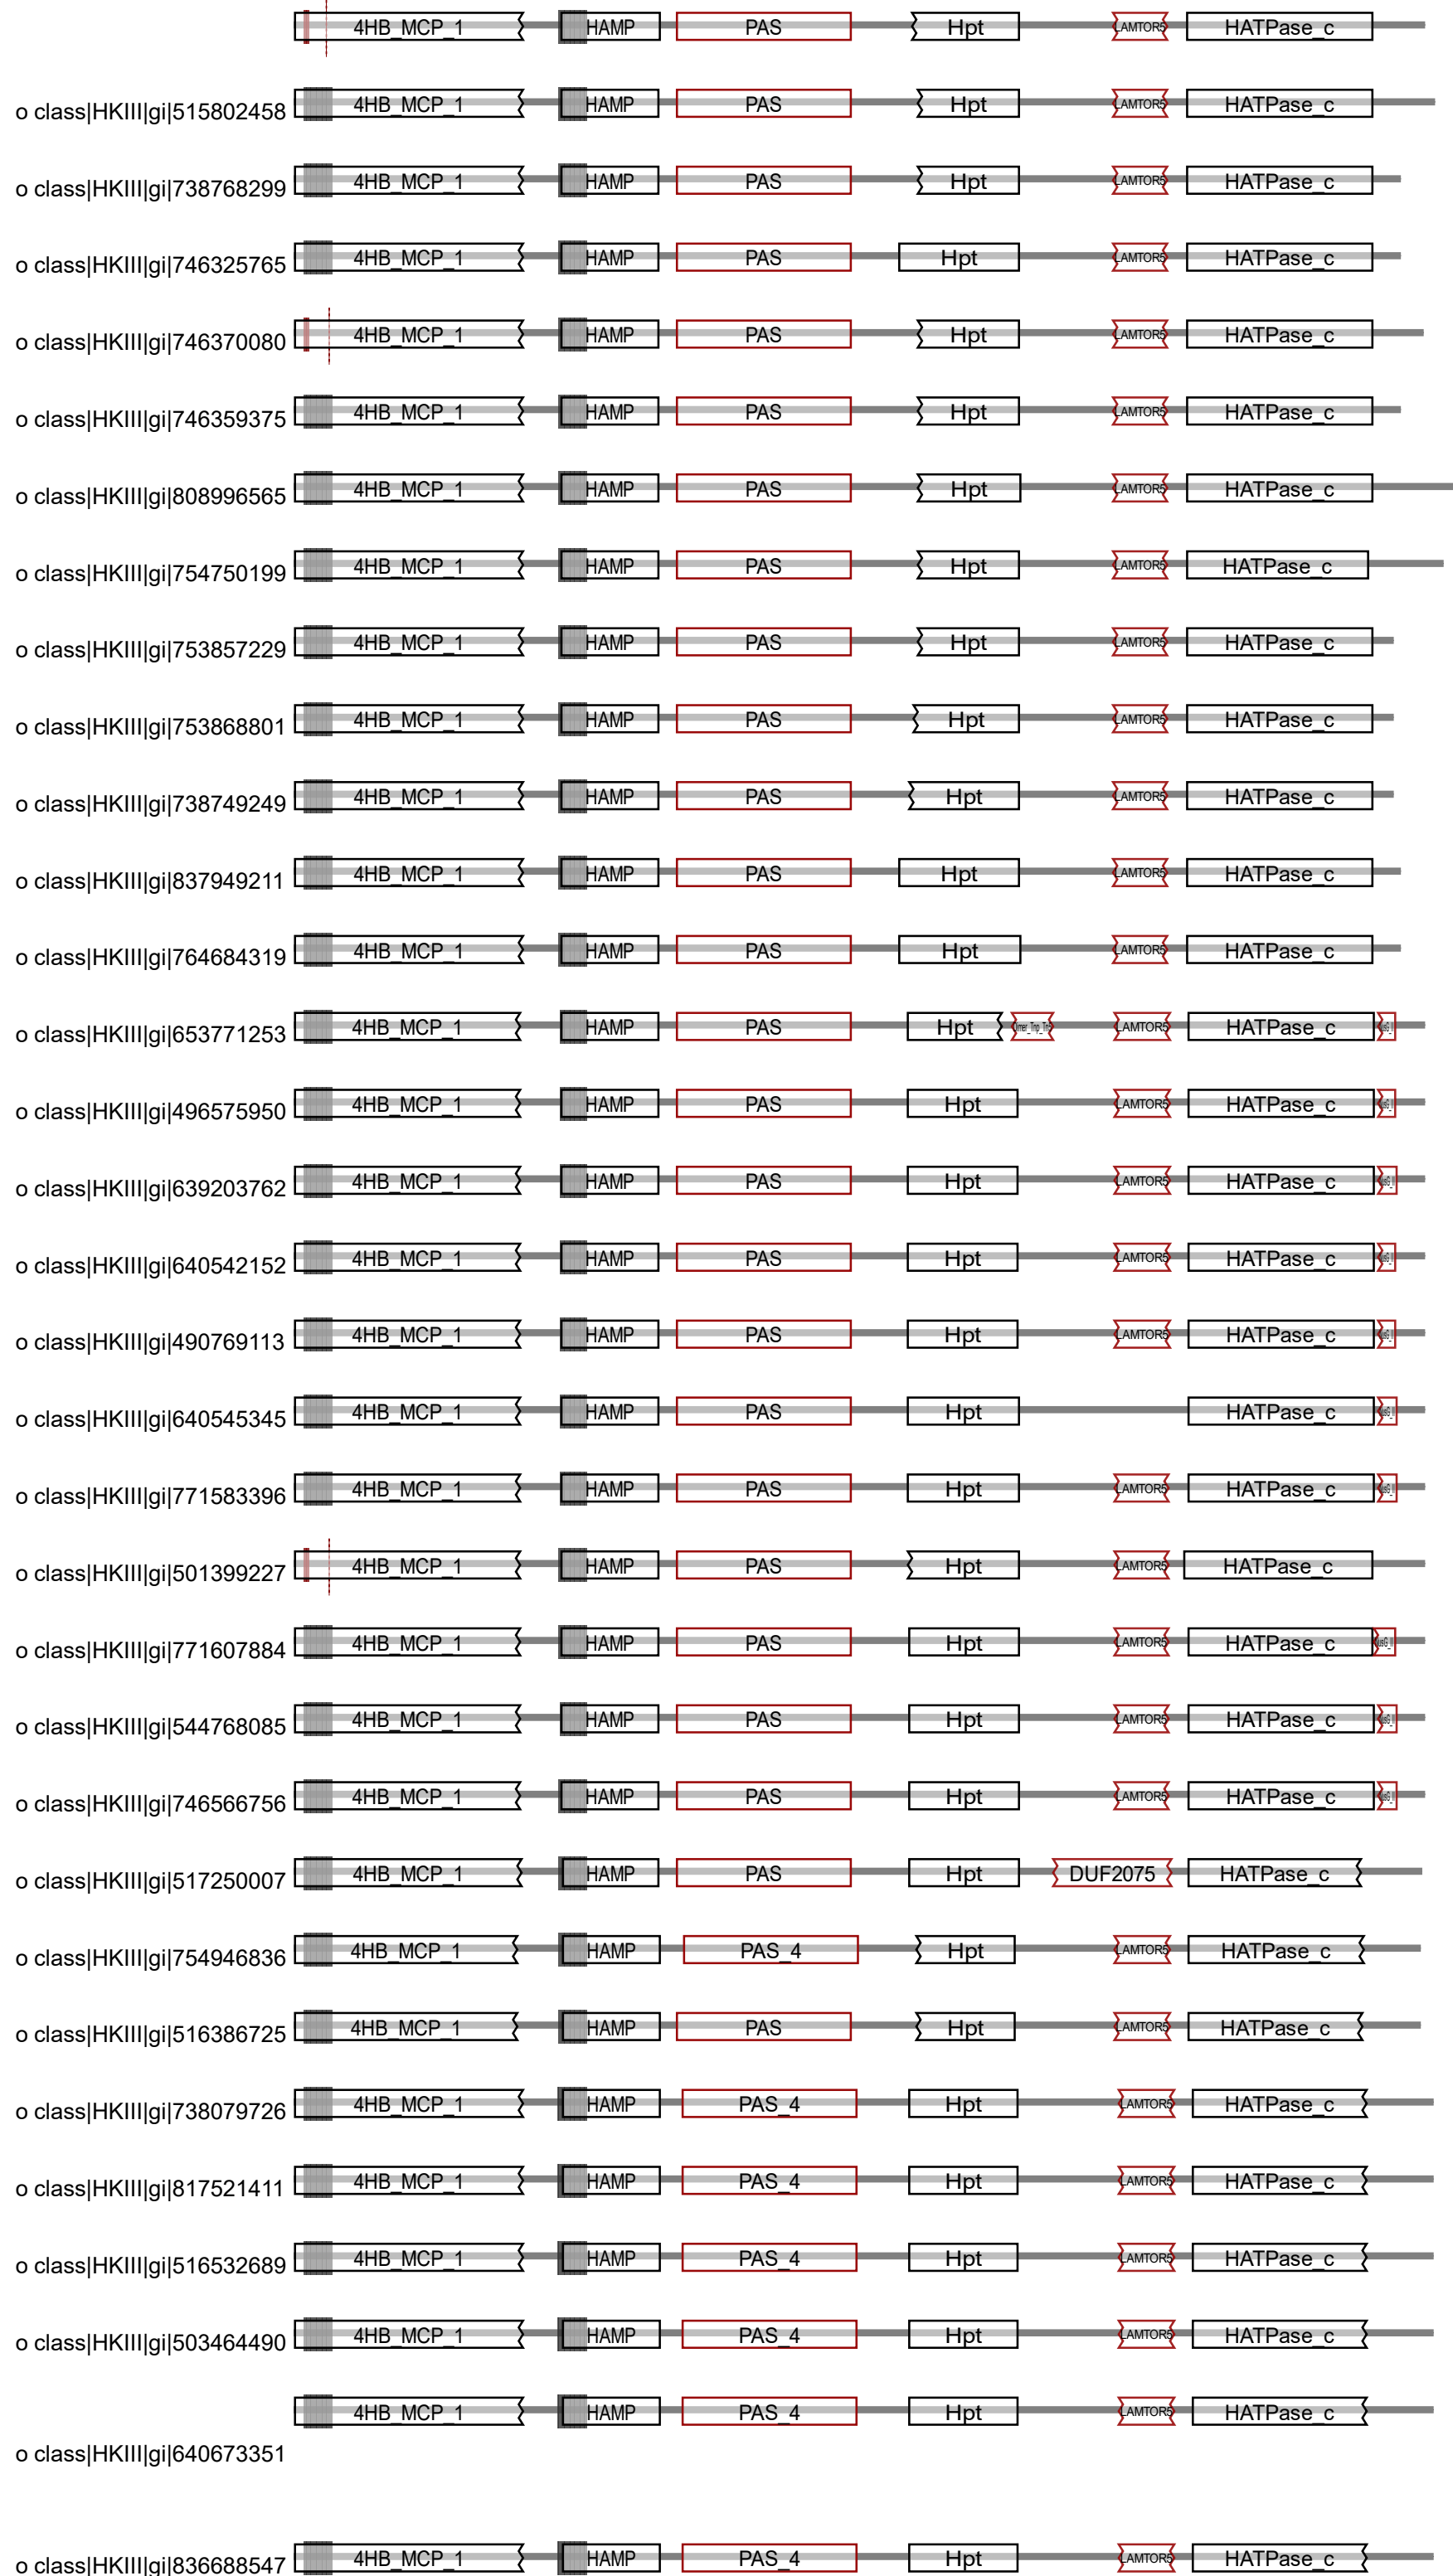

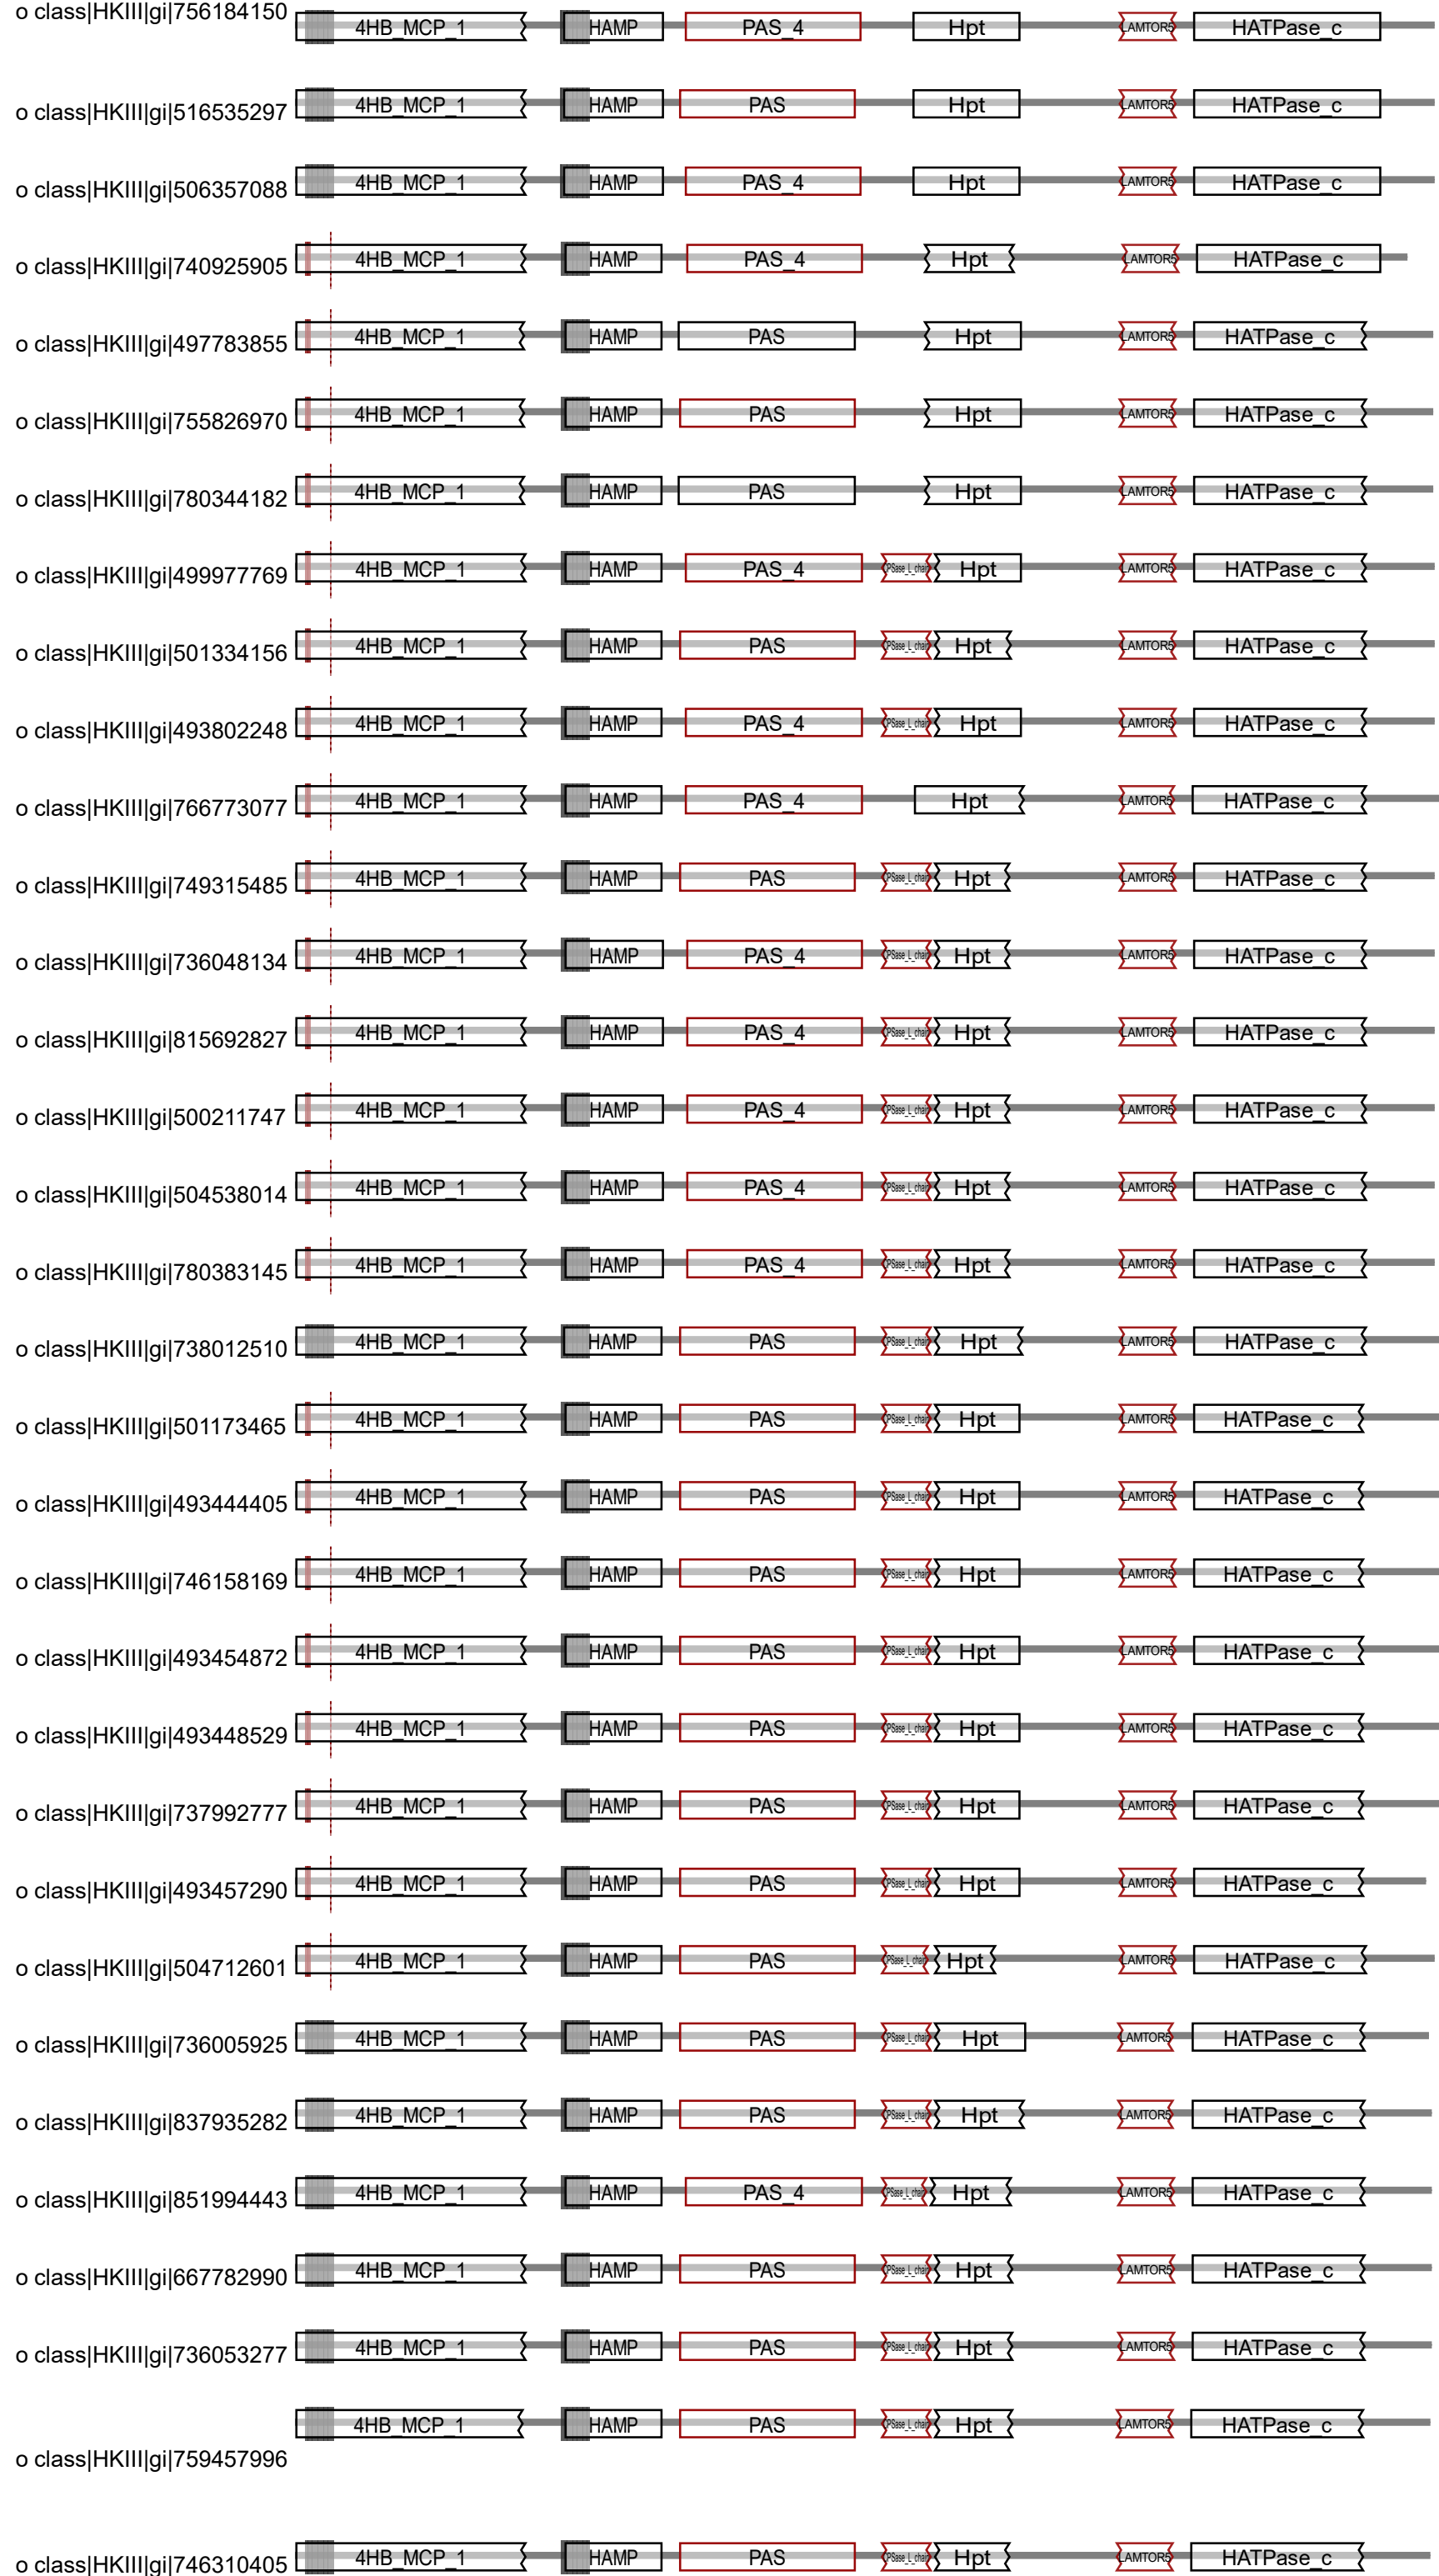

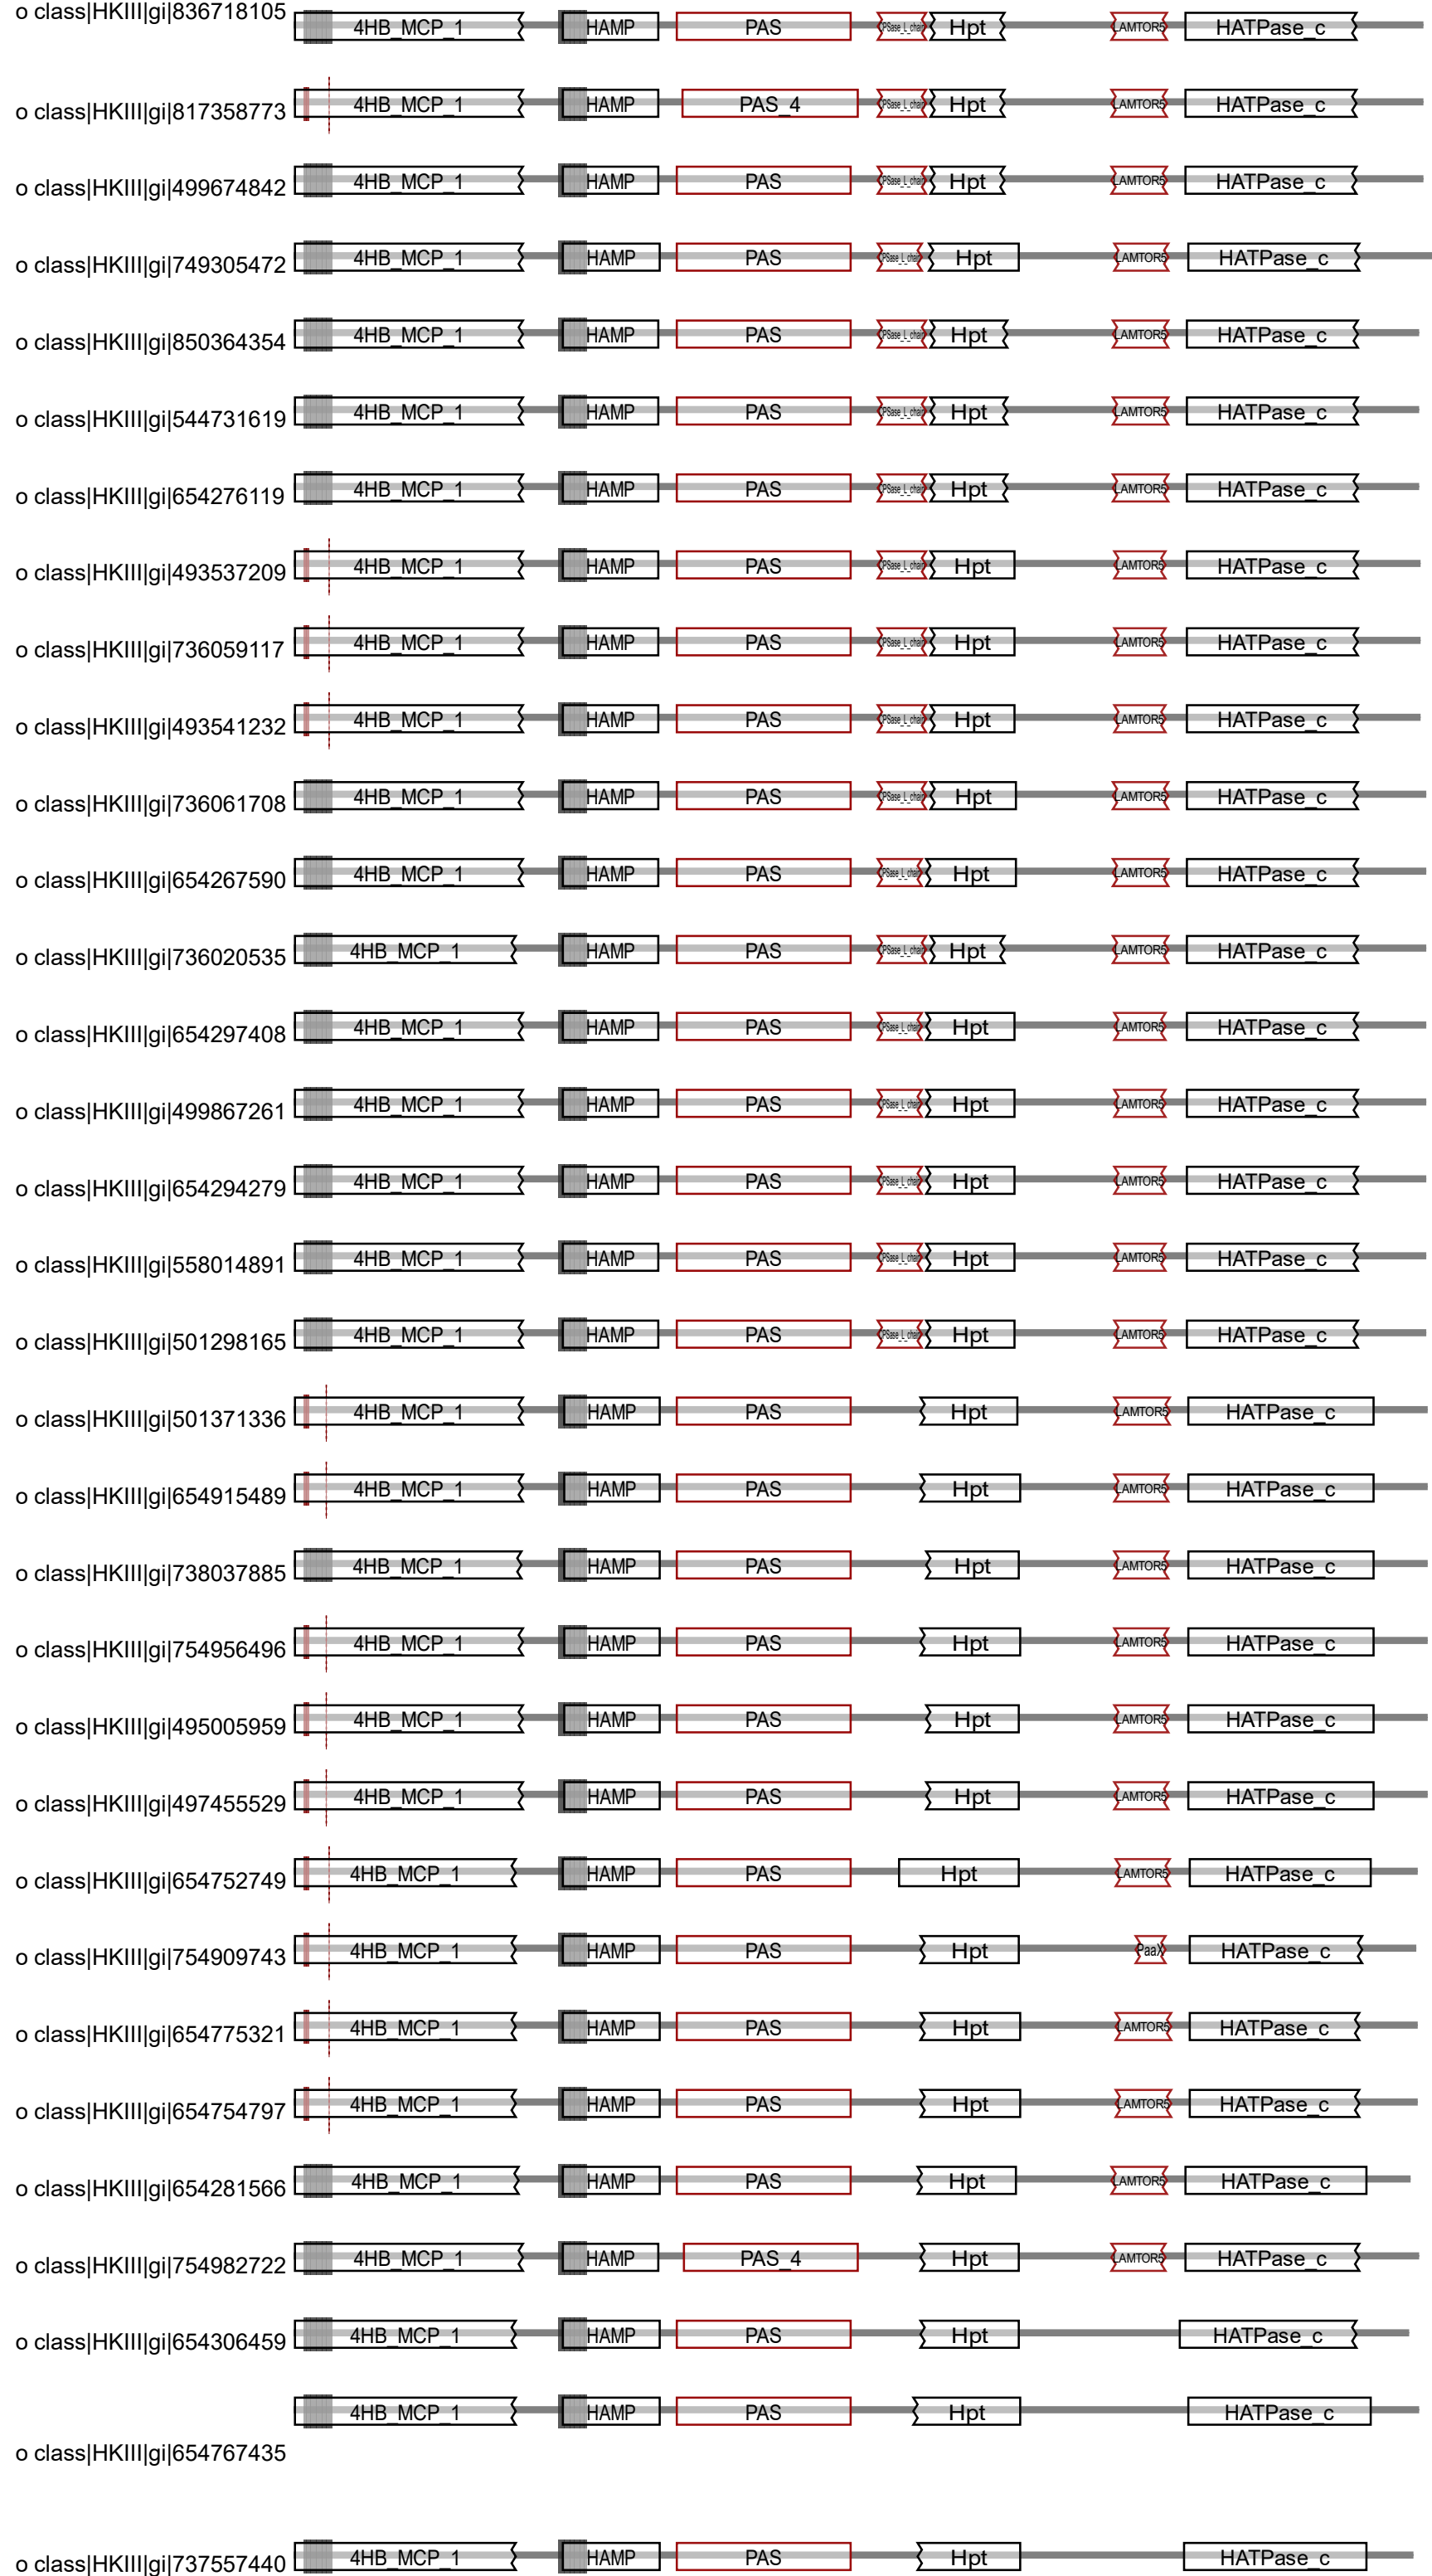



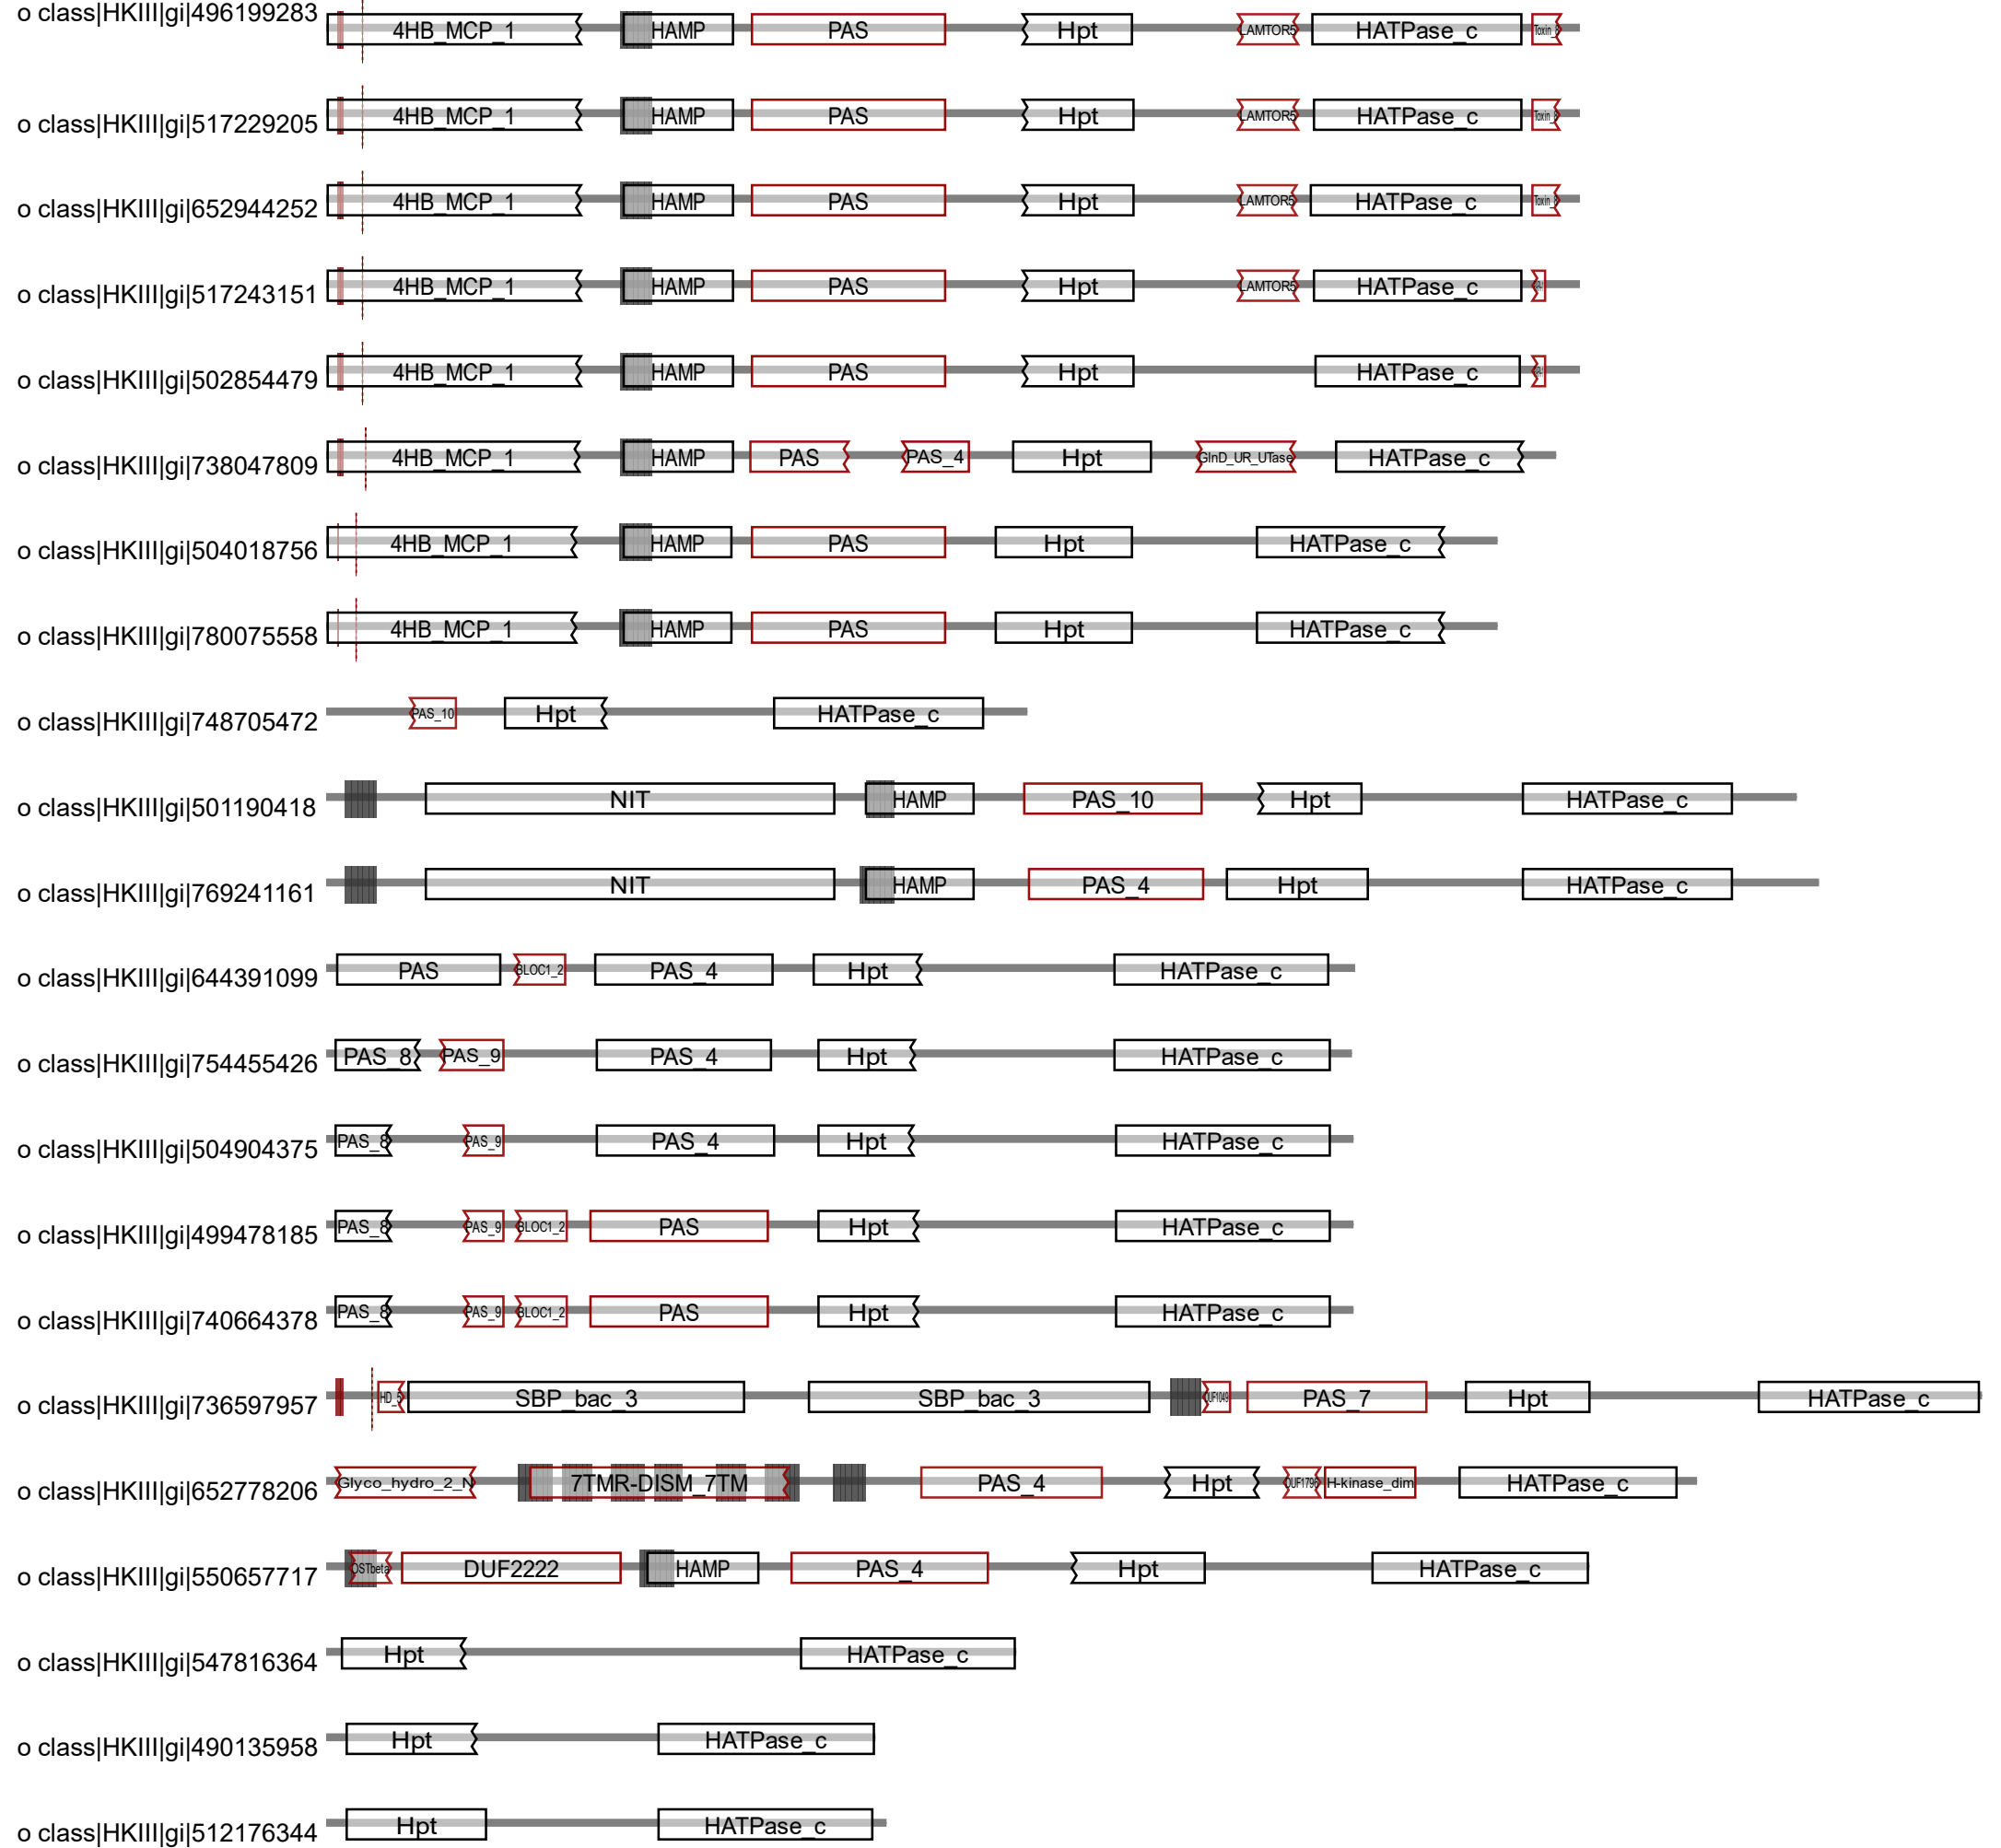

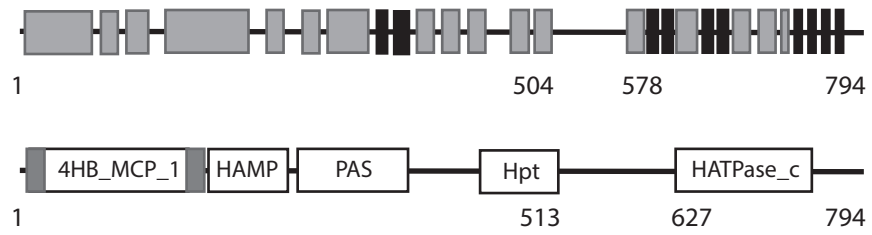

**Figure S2.** Secondary structure prediction for the typical HKIII protein. Gray rectangles depict alpha helices and black - beta-strands. Domain architecture of the same protein sequence is shown below.

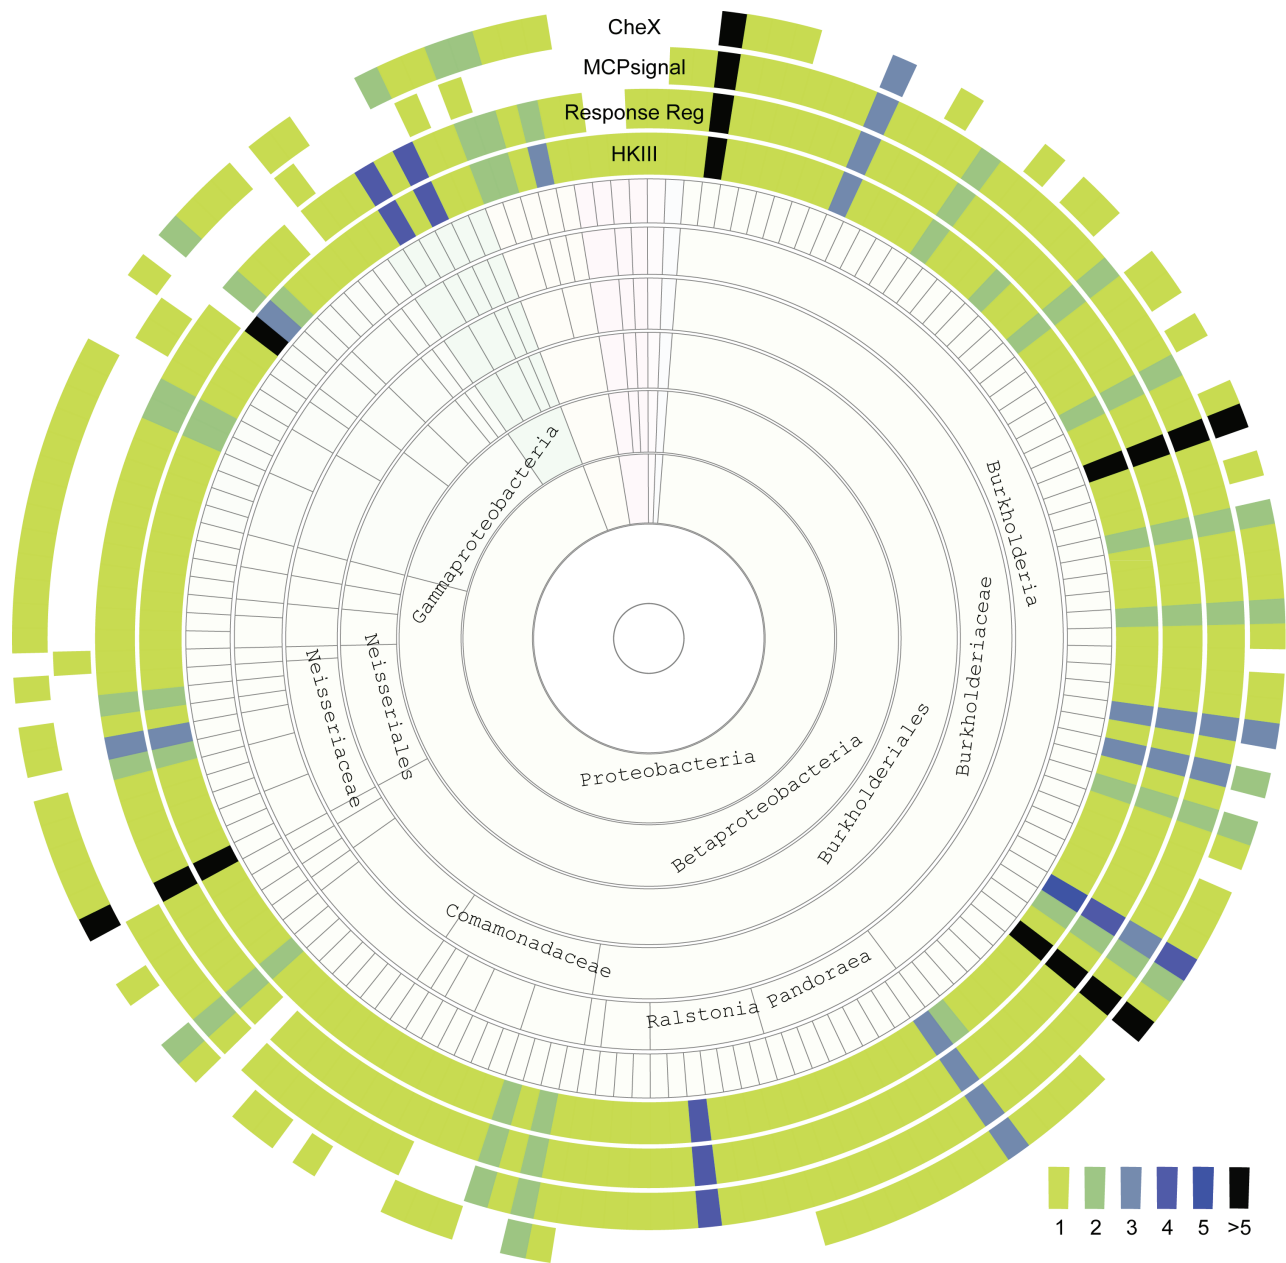

**Figure S3.** Co-presences of HKIII genes and genes coding for accessory proteins - MCP, CheY and CheX - found in the same gene neighborhood.

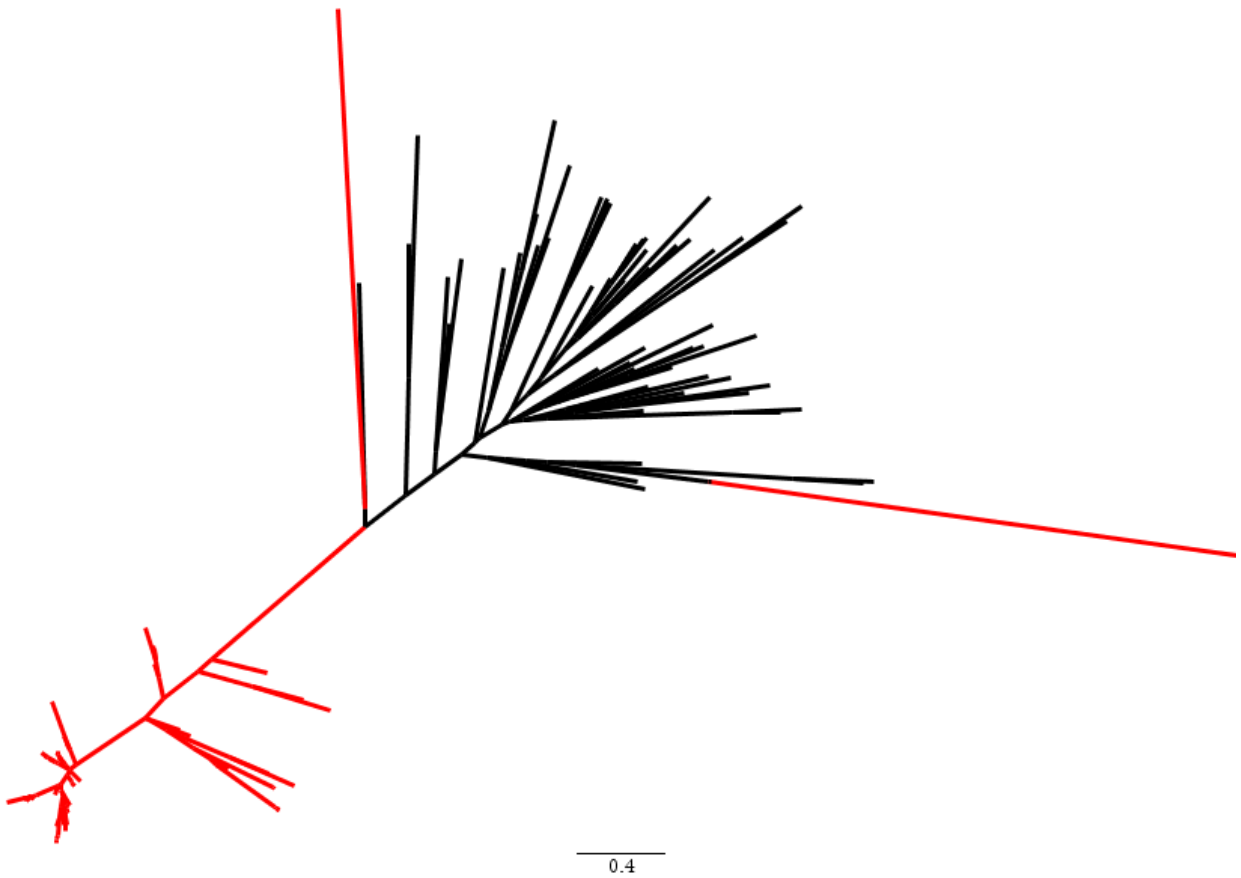

**Figure S4.** The phylogenetic tree of HKII- and HKIII-associated MCPs (MCPsignal domains) shown as black and red respectively. All available HKIII-associated and representative HKII-associated MCPs were used in the multiple sequence alignment. HKII-associated MCPs represented all chemotaxis classes from major bacterial phyla.

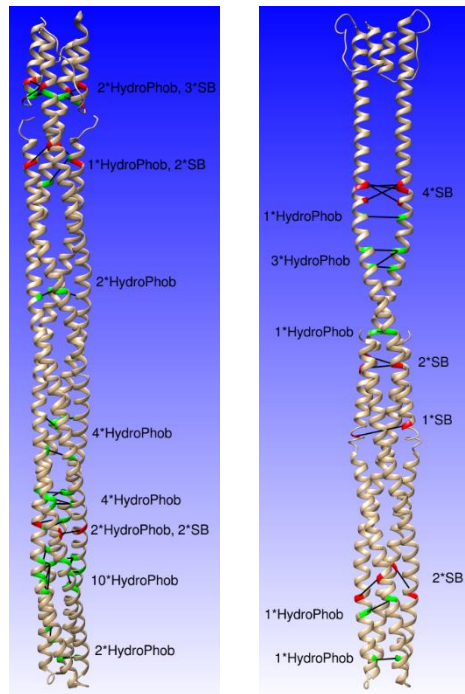

**Figure S5.** Salt bridges and aromatic residues making potential contacts mapped on the Tsr (left) and HKIII-MCP model (right) structures.

**Figure S6.** Multiple sequence alignment of the MCP tip region from MCP<sup>H<sup>KII</sup></sup> sequences

(identified by GI numbers) and selected representatives of full-length MCP from different length classes (identified by locus tags).

```
149793551      ISDTITVLAINASIIETSKENI DREGLSRIAEMIMELSNNTR
748705468      I VVGSK ILAINAQIEAARLQAGQAF SVVAQQMKVF SMETK
501027362      I VNQVI IVALNASIEAARAGEHGRGF AVVAAEVRSLAQRAE
750198371      I VSQVV IVALNASIEAARAGAHGRGF AVVASEVRELAQRAE
736173705      I VNQVI IVALNASIEAARAGT HGRGF AVVASEVVRDLAQRAE
736353940      I VNQVI IVALNASIEAARAGAHGRGF AVVASEVVRDLAQRAE
502999475      I VNQVI IVALNASIEAARAGAHGRGF AVVAQEVRDLAQRAE
748616433      I VNQVI IVALNASIEAARAGVHGRGF AVVAQEVRDLAQRAE
748216376      I VNQVI IVALNASIEAARAGVHGRGF AVVAQEVRDLAQRAE
516020601      I VNQVI IVALNASIEAARAGVHGRGF AVVAQEVRDLAQRAE
495604565      I VNQVI IVALNASIEAARAGVHGRGF AVVAQEVRDLAQRAE
737846699      I VRHVV IVSLNASIEAARAGT VGRGF AVVAGEVVRTLAARSE
519050491      I VRHVV IVSLNASIEAARAGQVGRGF AVVAGEVRELAARSE
501399226      I VRHVV IVSLNASIEAARAGQAGRGF AVVASEVVRSLAARSE
544768086      I VRHVV IVSLNASIEAARAGT AGRGF AVVASEVVRSLAARSE
653820470      I VRHVV IVSLNASIEAARAGT AGRGF AVVASEVVRSLAARSE
490769114      I VRHVV IVSLNASIEAARAGT AGRGF AVVASEVVRSLAARSE
739193639      I VRHVV IVSLNASIEAARAGT AGRGF AVVASEVVRSLAARSE
746566757      I VRHVV IVSLNASIEAARAGT AGRGF AVVASEVVRSLAARSE
771583398      I VRHVV IVSLNASIEAARAGT AGRGF AVVASEVVRSLAARSE
496533367      I VRHVV IVSLNASIEAARAGT AGRGF AVVASEVVRSLAARSE
739167756      I VRHVV IVSLNASIEAARAGT AGRGF AVVASEVVRSLAARSE
653771256      I VRHVV IVSLNASIEAARAGT AGRGF AVVASEVVRSLAARSE
652961889      I VRHVV IVSLNASIEAARAGP AGRGF AVVASEVVRSLAARSE
499809642      I VRHVV IVSLNASIEAARAGP AGRGF AVVASEVVRSLAARSE
771607883      I VRHVV IVSLNASIEAARAGQAGRGF AVVASEVVRTLAARSE
498503844      I VRHVL IVSLNASIEAARAGS AGRGF GIVAGEVVRSLATRSE
560180726      I VRHVL IVSLNASIEAARAGA AGRGF GIVASEVVRSLATRSE
746364335      I VRHVL IVSLNASIEAARAGA AGRGF GIVASEVVRSLATRSE
754750200      I VRHVL IVSLNASIEAARAGT AGRGF GIVASEVVRSLATRSE
808996568      I VRHVL IVSLNASIEAARAGT AGRGF GIVASEVVRSLATRSE
746325654      I VRHVL IVSLNASIEAARAGT AGRGF GIVASEVVRSLATRSE
746355811      I VRHVL IVSLNASIEAARAGT AGRGF GIVASEVVRSLATRSE
764684321      I VRHVL IVSLNASIEAARAGT AGRGF GIVASEVVRSLATRSE
515802459      I VRHVL IVSLNASIEAARAGP AGRGF GIVASEVVRSLATRSE
780345761      I VAHVS IVSLNASIEAARAGT AGRGF SIVASEVVRGLAARSQ
815692854      I VAHVS IVSLNASIEAARAGA AGRGF SIVASEVVRGLAARSQ
759573220      I VAHVS IVSLNASIEAARAGA AGRGF SIVASEVVRGLAARSQ
780383915      I VAHVS IVSLNASIEAARAGA AGRGF SIVASEVVRGLAARSQ
648533631      I VQHVL IVSLNASIEAARAGT AGRGF SIVAGEVVRSLASRSQ
652944253      I VQHVL IVSLNASIEAARAGT AGRGF SIVAGEVVRSLASRSQ
504018755      I VQHVL IVSLNASIEAARAGA AGRGF SIVASEVVRSLASRSQ
497455528      I VRHVL IVSLNASIEAARAGA AGRGF SIVASEVVRSLAARSQ
754956497      I VRHVL IVSLNASIEAARAGA AGRGF SIVASEVVRSLAARSQ
916784943      I VKQVV IVALNASIEAARAGE QGRGF AVVANEMRTL ANRAD
918255812      I VSQMI IVALNASIEAARAGA AGRGF AVVANEMRSL SVRAE
653279581      I VRQLV IVALNASIEAARAGT MGRGF AVVADEMRSLSVRAE
518407427      I VRQLV IVALNASIEAARAGT MGRGF AVVADEMRSLSVRAE
551342613      I TKQTI LLALNASIEAARAGE HGRGF AIVAEVVRNLANRSE
836703573      I VKHVV IVSLNASIEAARAGT AGRGF AVVASEVVRSLAARSE
737505137      I VRHVV IVSLNASIEAARAGA AGRGF AVVASEVVRTLAARSE
503356617      I VRHVV IVSLNASIEAARAGA AGRGF AVVASEVVRTLAARSE
```

|           |                                            |
|-----------|--------------------------------------------|
| 503107409 | I VRHV IVSLNASIEAARAGHAGRGFAVVASEVRSLAARSE |
| 654289795 | I VRHV IVSLNASIEAARAGPAGRGFAVVASEVRSLAARSE |
| 654263825 | I VRHV IVSLNASIEAARAGPAGRGFAVVASEVRSLAARSE |
| 654285990 | I VRHV IVSLNASIEAARAGPAGRGFAVVASEVRSLAARSE |
| 754970720 | I VRHV IVSLNASIEAARAGPAGRGFAVVASEVRSLAARSE |
| 646847946 | I VRHV IVSLNASIEAARAGPAGRGFAVVASEVRSLAARSE |
| 817515987 | I VRHV IVSLNASIEAARAGPAGRGFAVVASEVRSLAARSE |
| 654739755 | I VRHV IVSLNASIEAARAGPAGRGFAVVASEVRSLAARSE |
| 501397203 | I VRHV IVSLNASIEAARAGPAGRGFAVVASEVRSLAARSE |
| 737589793 | I VRHV IVSLNASIEAARAGPAGRGFAVVASEVRSLAARSE |
| 494320278 | I VRHV IVSLNASIEAARAGPAGRGFAVVASEVRSLAARSE |
| 662154484 | I VRHV IVSLNASIEAARAGPAGRGFAVVASEVRSLAARSE |
| 740925859 | I VAHV IVSLNASIEAARAGAAGRGFSIVASEVRTLAARSQ |
| 850364459 | I VAHV IVSLNASIEAARAGTAGRGFSIVASEVRGLAARSQ |
| 736062836 | I VAHV IVSLNASIEAARAGTAGRGFSIVASEVRGLAARSQ |
| 759459916 | I VAHV IVSLNASIEAARAGTAGRGFSIVASEVRGLAARSQ |
| 736059972 | I VAHV IVSLNASIEAARAGTAGRGFSIVASEVRGLAARSQ |
| 736015966 | I VAHV IVSLNASIEAARAGTAGRGFSIVASEVRGLAARSQ |
| 753122160 | I VAHV IVSLNASIEAARAGTAGRGFSIVASEVRGLAARSQ |
| 851994508 | I VAHV IVSLNASIEAARAGTAGRGFSIVASEVRGLAARSQ |
| 736051165 | I VAHV IVSLNASIEAARAGTAGRGFSIVASEVRGLAARSQ |
| 759483873 | I VAHV IVSLNASIEAARAGTAGRGFSIVASEVRGLAARSQ |
| 736004547 | I VAHV IVSLNASIEAARAGTAGRGFSIVASEVRGLAARSQ |
| 836718987 | I VAHV IVSLNASIEAARAGTAGRGFSIVASEVRGLAARSQ |
| 817359757 | I VAHV IVSLNASIEAARAGTAGRGFSIVASEVRGLAARSQ |
| 746310544 | I VAHV IVSLNASIEAARAGTAGRGFSIVASEVRGLAARSQ |
| 499674841 | I VAHV IVSLNASIEAARAGTAGRGFSIVASEVRGLAARSQ |
| 837936075 | I VAHV IVSLNASIEAARAGTAGRGFSIVASEVRGLAARSQ |
| 736006186 | I VAHV IVSLNASIEAARAGTAGRGFSIVASEVRGLAARSQ |
| 757755262 | I VAHV IVSLNASIEAARAGTAGRGFSIVASEVRGLAARSQ |
| 667782989 | I VAHV IVSLNASIEAARAGTAGRGFSIVASEVRGLAARSQ |
| 736053276 | I VAHV IVSLNASIEAARAGTAGRGFSIVASEVRGLAARSQ |
| 755829169 | I VAHV IVSLNASIEAARAGTAGRGFSIVASEVRGLAARSQ |
| 753123111 | I VAHV IVSLNASIEAARAGAAGRGFSIVASEVRGLAARSQ |
| 759451629 | I VAHV IVSLNASIEAARAGAAGRGFSIVASEVRGLAARSQ |
| 753120977 | I VAHV IVSLNASIEAARAGAAGRGFSIVASEVRGLAARSQ |
| 749305470 | I VAHV IVSLNASIEAARAGAAGRGFSIVASEVRGLAARSQ |
| 749316988 | I VAHV IVSLNASIEAARAGAAGRGFSIVASEVRGLAARSQ |
| 736052997 | I VAHV IVSLNASIEAARAGAAGRGFSIVASEVRGLAARSQ |
| 499867260 | I VAHV IVSLNASIEAARAGAAGRGFSIVASEVRGLAARSQ |
| 762943181 | I VAHV IVSLNASIEAARAGAAGRGFSIVASEVRGLAARSQ |
| 753124026 | I VAHV IVSLNASIEAARAGAAGRGFSIVASEVRGLAARSQ |
| 736001960 | I VAHV IVSLNASIEAARAGAAGRGFSIVASEVRGLAARSQ |
| 738013829 | I VAHV IVSLNASIEAARAGAAGRGFSIVASEVRGLAARSQ |
| 917489578 | I VAHV IVSLNASIEAARAGAAGRGFSIVASEVRGLAARSQ |
| 746158643 | I VAHV IVSLNASIEAARAGAAGRGFSIVASEVRGLAARSQ |
| 501444433 | I VAHV IVSLNASIEAARAGAAGRGFSIVASEVRGLAARSQ |
| 782656616 | I VAHV IVSLNASIEAARAGAAGRGFSIVASEVRGLAARSQ |
| 493444406 | I VAHV IVSLNASIEAARAGAAGRGFSIVASEVRGLAARSQ |
| 493448528 | I VAHV IVSLNASIEAARAGAAGRGFSIVASEVRGLAARSQ |
| 753127051 | I VAHV IVSLNASIEAARAGAAGRGFSIVASEVRGLAARSQ |
| 766773244 | I VAHV IVSLNASIEAARAGAAGRGFSIVASEVRGLAARSQ |
| 736048194 | I VAHV IVSLNASIEAARAGAAGRGFSIVASEVRGLAARSQ |
| 736020691 | I VAHV IVSLNASIEAARAGSAGRGFSIVASEVRGLAARSQ |
| 654775322 | I VSHV IVSLNASIEAARAGAAGRGFSIVAGEVRTLATRSQ |
| 654754798 | I VSHV IVSLNASIEAARAGAAGRGFSIVAGEVRTLATRSQ |
| 754909938 | I VSHV IVSLNASIEAARAGAAGRGFSIVAGEVRSLATRSQ |
| 654752750 | I VSHV IVSLNASIEAARAGAAGRGFSIVAGEVRSLATRSQ |
| 654306460 | I VSHV IVSLNASIEAARAGSAGRGFSIVAGEVRTLATRSQ |
| 759482225 | I VSHV IVSLNASIEAARAGAAGRGFSIVAGEVRALATRSQ |
| 654767434 | I VSHV IVSLNASIEAARAGAAGRGFSIVAGEVRALATRSQ |
| 737557441 | I VSHV IVSLNASIEAARAGAAGRGFSIVAGEVRALATRSQ |
| 654772510 | I VSHV IVSLNASIEAARAGSAGRGFSIVAGEVRALATRSQ |

|               |                                             |
|---------------|---------------------------------------------|
| 522054776     | I VAHVL IVSLNASIEAARAGTAGRGSIVASEVRTLATRSQ  |
| 502854480     | I VQHVL IVSLNASIEAARAGTAGRGSIVAGEVRSLSASRSQ |
| 496199282     | I VQHVL IVSLNASIEAARAGTAGRGSIVAGEVRSLSASRSQ |
| 648536256     | I VQHVL IVSLNASIEAARAGTAGRGSIVAGEVRSLSASRSQ |
| 756184149     | I VAHVL IVSLNASIEAARAGTAGRGSIVASEVRSLSASRSQ |
| 738079823     | I VAHVL IVSLNASIEAARAGTAGRGSIVASEVRSLSASRSQ |
| 738094369     | I VAHVL IVSLNASIEAARAGTAGRGSIVASEVRSLSASRSQ |
| 836688615     | I VAHVL IVSLNASIEAARAGTAGRGSIVASEVRSLSASRSQ |
| 506357087     | I VAHVL IVSLNASIEAARAGTAGRGSIVASEVRSLSASRSQ |
| 640673350     | I VAHVL IVSLNASIEAARAGTAGRGSIVASEVRSLSASRSQ |
| 654282298     | I VAHVL IVSLNASIEAARAGTAGRGSIVASEVRSLSASRSQ |
| 516386726     | I VAHVL IVSLNASIEAARAGTAGRGSIVASEVRSLSASRSQ |
| 754946835     | I VAHVL IVSLNASIEAARAGTAGRGSIVASEVRSLSASRSQ |
| 780075553     | I VQHVL IVSLNASIEAARAGTAGRGSIVASEVRSLSASRSQ |
| 738037882     | I VRHVL IVSLNASIEAARAGTAGRGSIVASEVRSLSASRSQ |
| 501371335     | I VRHVL IVSLNASIEAARAGTAGRGSIVASEVRSLSASRSQ |
| 654915488     | I VRHVL IVSLNASIEAARAGTAGRGSIVASEVRSLSASRSQ |
| 495005964     | I VRHVL IVSLNASIEAARAGTAGRGSIVASEVRSLSASRSQ |
| 916636166     | I VRQMT IVTLNASIEAARAGTAGRGSIVASEVRSLSASRSQ |
| 754220384     | I VRKMV IVALNASIEAARAGTAGRGSIVASEVRSLSASRSQ |
| 802675614     | I VRKMV IVALNASIEAARAGTAGRGSIVASEVRSLSASRSQ |
| 500119234     | I VRKMV IVALNASIEAARAGTAGRGSIVASEVRSLSASRSQ |
| 518531665     | I VRKMV IVALNASIEAARAGTAGRGSIVASEVRSLSASRSQ |
| 651302086     | I VRKMV IVALNASIEAARAGTAGRGSIVASEVRSLSASRSQ |
| 495124711     | I VRQMV IVALNASIEAARAGTAGRGSIVASEVRSLSASRSQ |
| M446_2055     | VAVQISMALVSGAIEAARAGEGGQGFAMVSGDIRALAREAG   |
| RC1_0344      | VAIQTNMLAVNGSIEAARAGEFGKGFVAVSTDIRNLARDSA   |
| Cbei_3953     | ITSQINILSLNATIEAARAGVQNGFSIVAEIIRKLAEEA     |
| Mmc1_3573     | IAEQTNMLALNASIEAARAGEAGKGFVAVANEVKALASQTA   |
| AZC_0660      | IASQTNLLALNATIEAARAGDAGKGFVAVASVVKSLAEQTS   |
| Acid345_1526  | IAQQTNLLALNATIEAARAGDAGKGFVAVANEVKELAKETA   |
| Noca_3602     | IAEQTNLLALNATIEAARAGEAGKGFVAVANEVKELAQETA   |
| Rmet_0672     | ITEQTNVLLALNAAIQASAGEAGRGSVVAEEVQRLAERSG    |
| DR_A0352      | ISSQTNLLSLHASIEAARAGEAGSRFVVADEVRLAEQTN     |
| Npun_R0249    | VADQTNLLSLNAAIEAEKAGEYGAGFVAVAREIRRLADQTA   |
| Caur_1666     | ISDETHLLALNAAIEAARAGEYGRRFVVAEEVKSLANRTL    |
| PBPRA0771     | IADQTNLLALNAAIEAARAGDQGRGFVAVAGEVNRNLSQLSG  |
| syc0531_d     | VASRTNLLALNAAIEAARAGQAGRGFVAVAGEVNRNLSQSA   |
| Z2940         | IAFQTNILALNAAVEAARAGEQGRGFVAVAGEVNRNLSRSA   |
| BMA1130       | IAFQTNILALNAAVEAARAGEQGRGFVAVASVRSLSAQSS    |
| Reut_B5597    | IAFQTNILALNAAVEAARAGEQGRGFVAVAGEVRSLSAQSS   |
| Pcar_2364     | IAFQTNLLALNAAVEAARAGQHKGKGFVVAEEVRSLSAARS   |
| Suden_0972    | IAFQTNLLALNAAVEAARAGEHGLGFVVAEEVNRNLSAQSS   |
| Amet_0249     | ISNQTNLLSLNAAIEAARAGEAGRGSVVAEIRKLAEQST     |
| BSU31260      | IADQTNLLALNAAIEAARAGESGRGSVVAEEVNRKLAVQSA   |
| SRU_2599      | IADRTNLLALNAGIEAARAGEEGQGFVVAEEVRTLAEERTD   |
| Acel_1872     | LADQTNLLALNAAIEAARAGEHGRGFVAVASVVRKLAERSQ   |
| Dde_1077      | IARQTNLLALNAAIEAARAGEHKGKGFVVAEEVVRKLAERSG  |
| CV_1013       | IAYQTNLLALNAAIEAARAGEHKGKGFVVAEEVVRKLAERSQ  |
| blr2345       | IARQTDLLALNAAVEAARAGEHKGKGFVAVASVVRKLAERSQ  |
| Mmc1_0628     | IARQTNLLALNAAIEAARAGEHKGKGFVAVASVVRKLAERSQ  |
| NIS_0787      | IASQTNLLALNAAIEAARAGEQKGFVVADEVNRNLAEKSR    |
| Bd2831        | IASQTNLLAFNAAIEAARAGEHGLGFVVADEVNRKLAERSS   |
| Ctha_2353     | IANQTNLLALNATIEAARAGEAGRGSVVADEVNRKLAERSS   |
| TK0630        | IAEQTNLLALNAAIEAARAGEQGRGFVAVADSVRELAEQSR   |
| CHY_0965      | IAEQTSLLALNAAIEAARAGEHGRGFVVAENVRKLAERSA    |
| PERMA_1487    | IADQTNLLALNAAIEAARAGEHKGKGFVVADEVNRKLAEDTS  |
| Acid345_1774  | LAEQTNLLALNAAIEAARAGEHGLGFVVADEVNRKLAEKSA   |
| SYO3AOP1_0921 | IADQTNLLALNAAIEVARAGEMGRGFVVADEVNRKLAERTQ   |
| THEYE_A0440   | IADQTNLLALNAAIEAARAGEQGRGFVVADEVNRKLAERTT   |
| AF1045        | IADQTNLLALNAAIEAARAGEHGRGFVVADEVNRKLAEESR   |
| CCV52592_1331 | IADQTNLLALNAAIEAARAGEHGRGFVVADEVNRKLAERTQ   |
| WS1209        | IADQTNLLALNAAIEAARAGEHGRGFVVADEVNRKLAERTQ   |



|                    |                                           |
|--------------------|-------------------------------------------|
| Sinac_4835         | VADQTNLLSINAAIEAEKAGEYGLGLVAVAREIRRLADMTA |
| TM0014             | IARETNILALNATIEAARAGEAGKGFMIVANEVQNLNETN  |
| LA_1214            | ITDRIGLLSLNASIEAARAGEAGKGFVVAQEIAKLGEQTQ  |
| Oter_3577          | IAFQTNLLALNASIEAARAGEAGAGFAVVAEEVRRMAMRAA |
| XCC1873            | IAFQTNILALNAAVEAARAGEQGRGFVVASEVRTLQQRSA  |
| GobsU_010100009683 | IAFQTNLLALNAAVEAARAGEQGRGFVVATEVRNLAQRSA  |
| Ngar_c10220        | IAGKTNLLALNAAIEAARAGEAGKGFVVANEVKDLAEGTA  |
| VC1405             | ISEQTNLLALNAAIEAARAGEQGRGFVVAVEVRLASRSQ   |
| Selin_0444         | IADQTNLLALNAAIEAARAGESGRGFVVAVEVRKLAEKTQ  |
| Dacet_0224         | IADQTNLLALNAAIEAARAGEAGRGFAVVADEVRKLAEKTQ |
| DEFDS_1855         | IADQTNLLALNAAIEAARAGDHGRGFVVAVEVRKLAEKTQ  |
| Shew185_2347       | IAEQTNLLALNAAIEAARAGTHGRGFVVAVEVRLATRTQ   |
| PA1423             | IAEQTNLLALNAAIEAARAGDQGRGFVVAVEVRQLAERTS  |
| Oter_2936          | ISERTNLLSLNASIEAARAGDAGRGFAVVAEEIRNLAERAA |
| BG0609             | IASQTNLLSMNAAIEASHAGEAGKGFVAIVAEIIDLAEQVT |
| Anamo_1724         | IAKQTNLLALNASIEAARAGEHGRGFVVASEVQKLASESK  |
| TDE0178            | IASQTNLLAMNAAIEAAHAGEAGKGFVVAVEIRKLAEESS  |
| Pmob_0228          | ITEQTNLLALNAAIEAARAGEAGRGFAVVADEIRKLAEESR |
| Taci_0309          | IADQTNLLALNAAIEAARAGEAGKGFVVAAEEVRKLAEESN |
| Anamo_0031         | IADQTNLLALNAAIEAARAGEAGRGFAVVAEEVRKLAEESA |
| Con_95%            | Is.ph.1luLNAuIEAARAG.tGpGFulVAtEh+tLutpst |

**Figure S7.** Sequence logo charts for three classes of histidine kinase domains.
